# Supplementary material for: A national surveillance project on chronic kidney disease management in Canadian primary care: a study protocol
Source: PubMed Central journal article supplement — BMJ Open. 2017 Aug 4;7(8):e016267. doi: 10.1136/bmjopen-2017-016267 (PMC5629677; doi:10.1136/bmjopen-2017-016267), 2017-08-04
Supplement: bmjopen-2017-016267.draft_revisions.pdf [file bmjopen-2017-016267.draft_revisions.pdf]

# BMJ Open

BMJ Open is committed to open peer review. As part of this commitment we make the peer review history of every article we publish publicly available.

When an article is published we post the peer reviewers' comments and the authors' responses online. We also post the versions of the paper that were used during peer review. These are the versions that the peer review comments apply to.

The versions of the paper that follow are the versions that were submitted during the peer review process. They are not the versions of record or the final published versions. They should not be cited or distributed as the published version of this manuscript.

BMJ Open is an open access journal and the full, final, typeset and author-corrected version of record of the manuscript is available on our site with no access controls, subscription charges or pay-per-view fees (<http://bmjopen.bmj.com>).

If you have any questions on BMJ Open's open peer review process please email [editorial.bmjopen@bmj.com](mailto:editorial.bmjopen@bmj.com)

# BMJ Open

## Improving CKD management in primary care using the Canadian Primary Care Sentinel Surveillance Network: Study protocol of a retrospective observational study

|                                    |                                                                                                                                                                                                                                                                                                                                                                                                                                                                                                                                                                                                                                                                                                                                                                                                                                                                             |
|------------------------------------|-----------------------------------------------------------------------------------------------------------------------------------------------------------------------------------------------------------------------------------------------------------------------------------------------------------------------------------------------------------------------------------------------------------------------------------------------------------------------------------------------------------------------------------------------------------------------------------------------------------------------------------------------------------------------------------------------------------------------------------------------------------------------------------------------------------------------------------------------------------------------------|
| Journal:                           | <i>BMJ Open</i>                                                                                                                                                                                                                                                                                                                                                                                                                                                                                                                                                                                                                                                                                                                                                                                                                                                             |
| Manuscript ID                      | bmjopen-2017-016267                                                                                                                                                                                                                                                                                                                                                                                                                                                                                                                                                                                                                                                                                                                                                                                                                                                         |
| Article Type:                      | Protocol                                                                                                                                                                                                                                                                                                                                                                                                                                                                                                                                                                                                                                                                                                                                                                                                                                                                    |
| Date Submitted by the Author:      | 03-Feb-2017                                                                                                                                                                                                                                                                                                                                                                                                                                                                                                                                                                                                                                                                                                                                                                                                                                                                 |
| Complete List of Authors:          | Bello, A; University of Alberta, Edmonton, Alberta, Canada. , Medicine<br>Ronksley, Paul; University of Calgary, Community Health Sciences<br>Tangri, Navdeep; University of Manitoba, Medicine<br>Singer , Alexander; University of Manitoba College of Medicine, Department<br>of Family Medicine ; Manitoba Primary Care Research Network<br>Grill, Allan; University of Toronto<br>Nitsch, Dorothea; LSHTM<br>Queenan, John; Queen's University in Kingston, ON, Canada<br>Lindeman, Cliff; University of Alberta, Family Medicine<br>Soos, Larka; University of Calgary, Calgary, AB, Canada, Family Medicine<br>Freiheit, Elizabeth; University of Michigan, Ann Arbor, MI, United States,<br>Institute for Social Research<br>Mangin, Dee ; McMaster University, Family Medicine<br>Drummond, Neil ; University of Alberta, Edmonton, AB, Canada, Family<br>Medicine |
| <b>Primary Subject<br>Heading</b>: | Renal medicine                                                                                                                                                                                                                                                                                                                                                                                                                                                                                                                                                                                                                                                                                                                                                                                                                                                              |
| Secondary Subject Heading:         | Epidemiology, Evidence based practice, General practice / Family practice,<br>Health informatics, Health services research                                                                                                                                                                                                                                                                                                                                                                                                                                                                                                                                                                                                                                                                                                                                                  |
| Keywords:                          | Protocols & guidelines < HEALTH SERVICES ADMINISTRATION &<br>MANAGEMENT, Quality in health care < HEALTH SERVICES<br>ADMINISTRATION & MANAGEMENT, Nephrology < INTERNAL MEDICINE,<br>Chronic renal failure < NEPHROLOGY                                                                                                                                                                                                                                                                                                                                                                                                                                                                                                                                                                                                                                                     |
|                                    |                                                                                                                                                                                                                                                                                                                                                                                                                                                                                                                                                                                                                                                                                                                                                                                                                                                                             |

SCHOLARONE™  
Manuscripts

1  
2  
3  
4  
5  
6  
7  
8  
9  
10  
11  
12  
13  
14  
15  
16  
17  
18  
19  
20  
21  
22  
23  
24  
25  
26  
27  
28  
29  
30  
31  
32  
33  
34  
35  
36  
37  
38  
39  
40  
41  
42  
43  
44  
45  
46  
47  
48  
49  
50  
51  
52  
53  
54  
55  
56  
57  
58  
59  
60

# Improving CKD management in primary care using the Canadian Primary Care Sentinel Surveillance Network: Study protocol of a retrospective observational study

Aminu K Bello<sup>1</sup>, MD, PhD, FRCP, Paul E. Ronksley<sup>2</sup>, PhD, Navdeep Tangri<sup>3</sup> MD, PhD, FRCPC, Alex Singer<sup>4</sup>, MD, Allan Grill<sup>5</sup>, MD, Dorothea Nitsch<sup>6</sup> MD, Dr Med, MSci, John A Queenan<sup>7</sup>, PhD, Cliff Lindeman<sup>8</sup>, MPH, Larka Soos<sup>9</sup> MSc, Elizabeth Freiheit<sup>10</sup> PhD, Dee Mangin<sup>11</sup> MBChB, DPH, FRNZCGP, Neil Drummond<sup>12</sup>, PhD

<sup>1</sup>Department of Medicine, University of Alberta, Edmonton, AB, Canada

<sup>2</sup>Department of Community Health Sciences, University of Calgary, Calgary, AB, Canada.

<sup>3</sup>Department of Medicine, University of Manitoba, Winnipeg, MB, Canada

<sup>4</sup>Department of Family Medicine, University of Manitoba, Winnipeg, MB, Canada

<sup>5</sup>Department of Family and Community Medicine, University of Toronto, Toronto, ON, Canada

<sup>6</sup>Department of Non-Communicable Disease Epidemiology, London School of Hygiene & Tropical Medicine, London, UK

<sup>7</sup>Epidemiologist for the Canadian Primary Care Sentinel Surveillance Network, Department of Family Medicine, Queen's University in Kingston, ON, Canada

<sup>8</sup>Department of Family Medicine, University of Alberta, Edmonton, AB, Canada

<sup>9</sup>Department of Family Medicine, University of Calgary, Calgary, AB, Canada

<sup>10</sup>Institute for Social Research, University of Michigan, Ann Arbor, MI, United States

<sup>11</sup>Department of Family Medicine, McMaster University, Hamilton, ON, Canada

<sup>12</sup>Department of Family Medicine, University of Alberta, Edmonton, AB, Canada

## Corresponding Author:

Aminu K Bello, MD PhD, FRCP

Division of Nephrology and Immunology

Department of Medicine

University of Alberta

11-107 Clinical Sciences Building, 8440 112 Street NW, Edmonton, Alberta, Canada T6B 2B7

Email: aminu1@ualberta.ca

Telephone: 780-492-1867

Fax: 780-407-7771

## Word Count

Abstract: 300

Main Text: (excluding abstract, references, tables, and figure): 2446

**Running title:** CKD Management in Canadian Primary Care

## ABSTRACT

**Introduction:** Effective chronic disease care is dependent on well-organized quality improvement (QI) strategies that monitor processes of care and outcomes for optimal care delivery. Although healthcare is provincially/territorially structured in Canada, there are national networks such as the Canadian Primary Care Sentinel Surveillance Network (CPCSSN) as important facilitators for national QI-based studies to improve chronic disease care. The goal of our study is to improve the understanding of how patients with chronic kidney disease (CKD) are managed in primary care and the variation across practices and provinces to drive improvements in care delivery.

**Methods and analysis:** The CPCSSN database contains anonymized health information from the electronic medical records for patients of participating primary care practices (PCPs) across Canada (N=1200). The dataset includes information on patient socio-demographics, medications, laboratory results and comorbidities. Leveraging validated algorithms, case definitions and guidelines will help define CKD and the related processes of care, and enable us to: 1) ascertain the burden of CKD in primary care; 2) determine the current practice pattern on CKD risk identification in primary care; and 3) investigate the variation in care indicators (e.g. achievement of BP and proteinuria targets) across patients' demographics and provider and regional characteristics. The prevalence of CKD stages 3-5 will be presented as age-sex standardized prevalence estimates stratified by province and as weighted averages for population rates with 95% confidence intervals (CI) using census data. For each PCP, age-sex standardized prevalence will be calculated and compared with expected standardized prevalence estimates. The process-based outcomes will be defined using established methods.

**Ethics and dissemination:** The CPCSSN is committed to high ethical standards when dealing with individual data collected, and this work is reviewed and approved by the Network Scientific Committee. The results will be published in peer-reviewed journals and presented at relevant national and international scientific meetings.

### Strengths and limitations of this study

- To our knowledge, this is the first nationwide and largest retrospective observational study on the epidemiology and management of CKD in primary care in Canada with potential to identify opportunities for improving quality of care for CKD at a national level.
- It will define the practice patterns on CKD risk identification in primary care by ascertaining whether high-risk groups are appropriately tested, monitored and managed for CKD based on existing guideline recommendations.
- It will investigate the variation in CKD care delivery across patient, provider and regional characteristics, relative to established quality indicators.
- This study leverages retrospective data collated at point of care, and therefore limitations include variable data quality and incomplete information in some data domains.
- The results of this study will enable the development of strategies and interventions to improve care and outcomes for patients with CKD.

## INTRODUCTION

There is an absence of effective surveillance mechanisms for chronic kidney disease (CKD) in most countries despite the overwhelming opinion of key stakeholders supporting such developments<sup>1,2</sup>. As with all other non-communicable diseases (NCDs), planning, development and implementation of effective and efficient care programs require reliable national data systems to monitor the burden of disease, processes of care and clinical outcomes.<sup>3-11</sup> Once established, these systems can be used for routine surveillance (including secular trends), quality improvement and resource allocation (including workforce planning). In Canada, they would also allow for within-country comparisons across provinces and territories, and evaluation of how the country compares with similar nations in CKD care. If combined with existing data sources (e.g., administrative databases), data on CKD management in primary care might also facilitate efforts to integrate CKD management with care for other major NCDs (e.g., diabetes, cardiovascular diseases, hypertension, obesity).<sup>4</sup>

Effective and sustainable chronic disease care is dependent on well-organized quality improvement (QI) strategies to monitor processes of care and outcomes and inform optimal care delivery.<sup>12</sup> In the CKD domain, end-stage renal disease (ESRD) care has been the sole focus of national QI activities, often administered in conjunction with national/regional registries (e.g., Canadian Organ Replacement Register, United States Renal Data System, European Renal Registry).<sup>4,12</sup> While there is no surveillance system for non-dialysis-dependent CKD in most countries, including Canada,<sup>4,13</sup> a few have developed initiatives in this direction<sup>14,4,12,13,15</sup>. A national CKD surveillance system using routinely collected practice data is feasible in nations with well-developed healthcare systems as CKD lends itself particularly well to surveillance because of its laboratory-based diagnosis<sup>16</sup>. Although healthcare is provincially/territorially structured and administered in Canada, there are existing national networks and collaborations such as the Canadian Primary Care Sentinel Surveillance Network (CPCSSN)<sup>17</sup> that can be important facilitators for national QI-based studies.

We set out to improve the understanding of how patients with CKD are managed and the variation across practitioners, regions and provinces to drive improvements in care delivery. Our study is a multidisciplinary (nephrology, primary care) and cross-jurisdictional effort leveraging data from the CPCSSN to investigate the epidemiology and management of CKD in the Canadian primary care system. The overarching aim is to use data derived from primary care electronic medical records (EMRs) to identify gaps in care, and provide opportunities for interventions to improve care and patient outcomes.

### Objectives:

1. Develop and validate a case definition for CKD in primary care and apply this to ascertain the burden of CKD in primary care, obtaining data on unidentified cases using standard criteria.<sup>18,19</sup>
2. Determine the current practice patterns on CKD risk identification in primary care by ascertaining whether high-risk groups (e.g., individuals with diabetes, hypertension and urologic disorders, and those with chronic use of nephrotoxic medications) are appropriately screened and managed for CKD.

3. Map the processes of care for CKD based on established quality indicators, and investigate the care variation across patients' demographics (age, sex, socio-economic status, rural/urban residence, comorbidity burden), provider characteristics (family physician/nurse practitioner, year of graduation, rural/urban, individual/group, fee for service) and regional characteristics (intra- and inter-provincial/territorial variation, rural versus urban).

## METHODS AND ANALYSIS

### Setting

The CPCSSN<sup>17,20,21</sup> is the first pan-Canadian multi-disease surveillance system. It is comprised of a network of twelve practice-based primary care research networks that collect primary care health information from the EMRs of primary care providers (PCPs) in eight out of the ten provinces and one out of the three territories in the country (**Figure 1**). There are 1180 sentinels (i.e., participating PCPs) contributing data to the CPCSSN, which is updated quarterly. This actively expanding repository currently contains data on approximately 1.5 million Canadians. The initial focus of the CPCSSN was to conduct surveillance on five chronic conditions: diabetes, hypertension, osteoarthritis, chronic obstructive pulmonary disease and depression. Subsequently, it was expanded to include three neurological conditions: dementia, epilepsy and Parkinson's disease. Our project team has been instrumental in working with CPCSSN to further expand on these conditions by including CKD.

### Population and data sources

Data for the CPCSSN database are extracted from the EMRs of participating sentinels, rendered anonymous, coded and processed using established frameworks described in detail elsewhere.<sup>21,22</sup> The data are placed in regional network databases and then merged into the national repository. It is made available for surveillance and research, and increasingly for quality improvement projects and for clinical decision support where available, through the implementation of a patient re-identification tool held only within the custodial clinics themselves. With appropriate data sharing agreements with its sentinel PCPs, CPCSSN data may be linked with administrative health data for future work to follow up on CKD-related outcomes (e.g., ascertainment of progression to dialysis requirement using registry data).

The CPCSSN database will be used to develop a cohort of CKD patients being managed in primary care between January 1, 2010 and December 31, 2015 (baseline cohort), and from January 1, 2016 onwards (open cohort). The database is updated quarterly, allowing for identification of new CKD patients who meet the inclusion criteria during the study period. The CPCSSN database contains patient information on socio-demographics (age, sex, socio-economic status (calculated deprivation category)), treatment (medications data), laboratory results and comorbidities (**Table 1, Figure 2**).<sup>21,23</sup> Patients under 18 years of age will be excluded from the cohorts, as will those diagnosed with ESRD and on dialysis or having renal transplant. We will leverage validated algorithms, case definitions and guidelines to define CKD, at-risk population and processes of care measures based on established methods and criteria (**Table 2**).<sup>24,25,26</sup>

### Identification of CKD

The major focus is to validate a case definition for CKD in primary care using the CPCSSN repository to enable us to identify patients with CKD. We will leverage the existing frameworks

1  
2  
3 and conventions by national and international CKD guidelines, and definitions used  
4 elsewhere.<sup>25,27</sup> Individuals with at least one face-to-face PCP encounter and two calculated  
5 (using CKD-EPI equation) eGFR values  $<60$  ml/min per  $1.73$  m<sup>2</sup>  $>90$  days apart or having an  
6 International Classification of Diseases (ICD-9) diagnosis code for CKD used at least twice in an  
7 outpatient encounter as of December 31, 2015, will be defined to have CKD. We recognize the  
8 significant limitations of the ICD-9 codes when applied for CKD identification in the  
9 community, however, its use will allow us to capture those patients with CKD who may or may  
10 not have had an abnormal eGFR. In a secondary analysis, CKD will be defined by eGFR $<45$   
11 ml/min/ $1.73$ m<sup>2</sup> using two values of eGFR  $>90$  days apart. This definition was selected because  
12 although GFR $<60$  ml/min/ $1.73$ m<sup>2</sup> constitutes CKD, individuals with GFR between 45 and 60  
13 ml/min/ $1.73$ m<sup>2</sup> usually have favorable prognosis in the absence of proteinuria, and are  
14 substantially fewer in number than those with GFR $<45$ /min/ $1.73$ m<sup>2</sup>. Patients with eGFR $<45$   
15 ml/min/ $1.73$ m<sup>2</sup> are also a more attractive population for intervention due to higher risk of  
16 adverse clinical outcomes including risk of progression to ESRD<sup>2,14</sup>. Validation of the primary  
17 care CKD case definition algorithm will consist of an expert blinded chart review and  
18 identification of cases in a random sample of 1000 CPCSSN charts, containing both original and  
19 cleaned text data from the EMRs for patients aged 18 years or older, and comparison with the  
20 outcome of an independent search of the same sample using the CPCSSN case finding algorithm.  
21 Analysis will consist of calculations of sensitivity, specificity and positive and negative predicted  
22 values. The prevalence of CKD stages 3-5 will be presented as unadjusted prevalence estimates  
23 and weighted averages for population rates with 95% confidence intervals (CI) using the census  
24 data, and stratified by PCP, rural/urban location and province or territory.

### 30 Evaluation of processes of care

31 The process-based outcomes (quality of care metrics) will be defined and evaluated using  
32 established methods across key domains of risk identification and case finding for CKD, as well  
33 as delivery of appropriate management including monitoring of risk factors for progression and  
34 cardiovascular disease (CVD), and referral for specialist nephrology care where necessary. This  
35 entails monitoring for the classical risk parameters such as blood pressure, proteinuria, glycemia,  
36 dyslipidemia and progression risk based on eGFR and proteinuria trajectories over time (**Table**  
37 **2**).

### 42 Data analysis

#### 43 *Covariates definition and evaluation of CKD markers*

44 Socio-demographic, clinical, laboratory and medication data will be classified using standard  
45 definitions established by the CPCSSN.<sup>17,23,28-32</sup> Other comorbid conditions relevant to the care  
46 of CKD patients but not defined by the CPCSSN (coronary artery disease, stroke, peripheral  
47 vascular disease, heart failure) will be identified using standard procedures to search for those  
48 diagnoses in patients' medical records (based on validated ICD-9-CM coding algorithms<sup>33</sup>).  
49 Baseline kidney function (using estimated glomerular filtration rate, eGFR) will be calculated  
50 using all serum creatinine measurements taken within a six-month period of the first creatinine  
51 measurement, with the index eGFR defined as the mean of the six-month measurements.  
52 Assessment of urine protein excretion will be estimated using the albumin: creatinine ratio  
53 (ACR) based on spot urine measurements using standard conventions.<sup>24</sup> All CKD cases will be  
54 risk-stratified, defined and classified according to current guideline recommendations.<sup>24</sup>  
55  
56  
57  
58  
59  
60



1  
2  
3 Demographic information (including age, sex and postal code) of those with and at risk of CKD  
4 will be extracted (**Tables 1 & 2**). Normally distributed variables will be summarized as means  
5 with standard deviations (SD), and non-normally distributed data will be summarized as medians  
6 with interquartile ranges (IQR). Dichotomous data will be expressed in percentages. The  
7 representativeness of the study population will be tested by comparing their age and sex profiles  
8 to the population distribution as reported in the Canadian 2011 Census (adjusting for 2016  
9 census data when available).  
10  
11

## 14 **ETHICS AND DISSEMINATION**

15 The CPCSSN is committed to high ethical standards when handling individual patient data  
16 collected from EMRs of participating PCPs from across Canada. These data are aggregated and  
17 stored in CPCSSN's central repository at the Centre for Advanced Computing, Queens  
18 University in Kingston, Ontario. There are well-developed organizational, physical and  
19 technological safeguards at all levels (clinic, provincial, national) to ensure that the privacy of  
20 patients is protected and that all collection, retention, use or disclosure of data complies with  
21 applicable privacy legislation and ethical requirements.<sup>17,21</sup> All personal identifiers are removed  
22 from the data in the national research repository to protect patient confidentiality.<sup>21</sup> The protocol  
23 has undergone a scientific review and approval by the CPCSSN Surveillance and Research  
24 Standing Committee (SRSC), and ethical approval for the study was granted by the University of  
25 Alberta Health Research Ethics Committee.  
26  
27  
28

29 This project uses an integrated knowledge translation (KT) strategy, where relevant stakeholders  
30 (patients, practitioners, policymakers) have been involved from inception (proposal  
31 development) to ensure that the project addresses the needs of patients and practitioners. The  
32 high priority that the investigators and network leaders place on the project will ensure that we  
33 drive it forward to completion, to allow us to meaningfully change the way that care is delivered  
34 to CKD patients. For example, after identifying regions/clusters with especially suboptimal CKD  
35 care, we will partner with providers, policymakers and regional health authorities to improve  
36 care in those regions. We will apply the KT Canada Knowledge-to-Action Cycle Framework and  
37 other established methods (e.g., PDSA (Plan, Do, Study, Act) concept) to disseminate our  
38 findings to all relevant stakeholders and end-users for action.<sup>34,35</sup> We will leverage our  
39 collaborations with existing platforms and research networks such as the Canadian Society of  
40 Nephrology, CANN-NET (CANadian KidNey KNowledge TraNslation and GEneration  
41 NeTwork), Can-SOLVE CKD (Canadians Seeking Solutions and Innovations to Overcome  
42 Chronic Kidney Disease) and the country-wide Primary and Integrated Healthcare Innovation  
43 Networks to ensure the translation of our findings across provinces and territories, as well as  
44 internationally through our associations with the International Society of Nephrology and the  
45 Kidney Disease Improving Global Outcomes (KDIGO) team.<sup>4,36</sup> The results will be published in  
46 leading general medicine, nephrology and primary care peer-reviewed journals and presented at  
47 relevant national and international scientific meetings. A performance report will be produced  
48 against the indicators relevant to each objective, aggregated by practice sentinel, to highlight  
49 practice performance and map out areas for improvement, critical for continuing professional  
50 development of PCPs and helping to enhance CKD management in primary care.  
51  
52  
53  
54  
55  
56  
57  
58  
59  
60

## DISCUSSION & CONCLUSIONS

This work will close the information gap between observed and expected burdens and risks of CKD and map out standards of care achieved, providing opportunities for focused and effective population-level QI strategies and other service improvement initiatives. This project will demonstrate proof of concept for an early identification and management of CKD program in primary care, and provide the basis for developing relevant policies and KT strategies to enhance the uptake of findings – for people with CKD, and other chronic diseases as well. The work will facilitate identification and appropriate management of CKD patients at high risk of progression to ESRD.

We have anticipated potential threats and have devised strategies to mitigate them. The first related to feasibility within the defined timeframe (**Figure 3**). This is unlikely to hinder the success of the project as we have completed significant preliminary work for data access, and the team has considerable experience with the use of this kind of data for policy-relevant research.<sup>4,19,34,37,38</sup> Second, limitations general to the use of EMR data in research are acknowledged. The collated information is based on clinical encounters and needs, and thus may be missing for some important key variables and data quality may vary by region and/or sentinel; specifically, data on patients' priorities and satisfaction of care are rarely collated in a clinical setting. However, most important demographic, clinical and laboratory information needed for this study are well captured in the existing platform chosen for this work.

Planning, development and implementation of nephrology services require reliable information systems and databases to capture information on trends in disease burden, processes of care and related outcomes. In the absence of national/regional health information systems, one way to achieve this is by the creation of surveillance systems using routine practice data, such as the CPCSSN. The established conventions and guidelines on CKD can be leveraged for systematic case definition and evaluation of quality of care across settings. This can be facilitated by validation as well as enactment of quality metrics to measure the processes, quality of care and related outcomes, and generate uniformity across databases which may permit analyses across countries and regions. It is important to detect CKD early enough to be able to implement effective interventions. On-going primary care management of key risk factors for CKD (e.g., hypertension, vascular disease, diabetes) is likely one effective strategy to reduce progression of CKD and reduce adverse complication rates. Early detection and treatment of CKD and reducing adverse events with appropriate medications also reduces the morbidity and cost of CKD and related complications. The work described in this protocol therefore has a huge potential to address the identified gaps for optimal care delivery of CKD at the primary care level that would impact positively on patients' outcomes and health system improvement.

1  
2  
3 **Contributors:** AKB and ND had the original idea for this study. AKB and PER wrote the first  
4 draft of the manuscript. PER, NT, AS, AG, DN, JAQ, CL, LS, EF, and DM contributed to the  
5 development of the idea, the study design and reviewed the manuscript for intellectual content.  
6 All authors approved the final submitted version of the manuscript.  
7  
8

9 **Funding:** This work is supported by the Canadian Institute of Health Research (CIHR)  
10 Operating Grant: SPOR PIHCI Network: Quick Strikes Grant (ref# RN281786), through the  
11 Universities of Alberta and Manitoba, and McMaster University.  
12  
13

14 **Competing interests:** None declared.  
15

16 **Ethics approval:** This project has been approved by the University of Alberta Health Research  
17 Ethics Committee. Identifiable patient data will not be shared during the project, thus  
18 maintaining confidentiality.  
19  
20

21 **Disclaimer:** The views expressed are those of the authors and not necessarily those of the CIHR,  
22 CPCSSN or the various institutions represented.  
23  
24

25 **Data sharing statement:** The authors will make available the full statistical analysis of the study  
26 results following publication if and when required. The results of the study will be submitted for  
27 publication in a leading medical/nephrology peer-reviewed journal.  
28  
29  
30  
31  
32  
33  
34  
35  
36  
37  
38  
39  
40  
41  
42  
43  
44  
45  
46  
47  
48  
49  
50  
51  
52  
53  
54  
55  
56  
57  
58  
59  
60

**REFERENCES**

1. Radhakrishnan J, Remuzzi G, Saran R, et al. Taming the chronic kidney disease epidemic: a global view of surveillance efforts. *Kidney Int* 2014;86:246-50.
2. Couser WG, Remuzzi G, Mendis S, Tonelli M. The contribution of chronic kidney disease to the global burden of major noncommunicable diseases. *Kidney Int* 2011;80:1258-70.
3. James MT, Hemmelgarn BR, Tonelli M. Early recognition and prevention of chronic kidney disease. *Lancet* 2010;375:1296-309.
4. Bello AK, Levin A, Manns BJ, et al. Effective CKD care in European countries: challenges and opportunities for health policy. *Am J Kidney Dis* 2015;65:15-25.
5. McBride D, Dohan D, Handley MA, Powe NR, Tuot DS. Developing a CKD registry in primary care: provider attitudes and input. *Am J Kidney Dis* 2014;63:577-83.
6. Stevens PE, O'Donoghue DJ, de Lusignan S, et al. Chronic kidney disease management in the United Kingdom: NEOERICA project results. *Kidney Int* 2007;72:92-9.
7. de Lusignan S, Chan T, Stevens P, et al. Identifying patients with chronic kidney disease from general practice computer records. *Fam Pract* 2005;22:234-41.
8. Garg AX, Adhikari NK, McDonald H, et al. Effects of computerized clinical decision support systems on practitioner performance and patient outcomes: a systematic review. *JAMA* 2005;293:1223-38.
9. Collins AJ, Foley RN, Gilbertson DT, Chen SC. United States Renal Data System public health surveillance of chronic kidney disease and end-stage renal disease. *Kidney Int Suppl* (2011) 2015;5:2-7.
10. Borbolla D, Giunta D, Figar S, Soriano M, Dawidowski A, de Quiros FG. Effectiveness of a chronic disease surveillance systems for blood pressure monitoring. *Stud Health Technol Inform* 2007;129:223-7.
11. Indicators for chronic disease surveillance. *MMWR Recomm Rep* 2004;53:1-6.
12. Radhakrishnan J, Remuzzi G, Saran R, et al. Taming the chronic kidney disease epidemic: a global view of surveillance efforts. *Kidney Int* 2014;86:246-50.
13. Saran R, Hedgeman E, Plantinga L, et al. Establishing a national chronic kidney disease surveillance system for the United States. *Clin J Am Soc Nephrol* 2010;5:152-61.
14. Mariani L, Stengel B, Combe C, et al. The CKD Outcomes and Practice Patterns Study (CKDopps): Rationale and Methods. *Am J Kidney Dis* 2016;68:402-13.
15. Levey AS, Schoolwerth AC, Burrows NR, Williams DE, Stith KR, McClellan W. Comprehensive public health strategies for preventing the development, progression, and complications of CKD: report of an expert panel convened by the Centers for Disease Control and Prevention. *Am J Kidney Dis* 2009;53:522-35.
16. Drawz PE, Archdeacon P, McDonald CJ, et al. CKD as a Model for Improving Chronic Disease Care through Electronic Health Records. *Clin J Am Soc Nephrol* 2015;10:1488-99.
17. Birtwhistle R, Keshavjee K, Lambert-Lanning A, et al. Building a pan-Canadian primary care sentinel surveillance network: initial development and moving forward. *J Am Board Fam Med* 2009;22:412-22.
18. Bello AK, Hemmelgarn B, Lloyd A, et al. Associations among estimated glomerular filtration rate, proteinuria, and adverse cardiovascular outcomes. *Clin J Am Soc Nephrol* 2011;6:1418-26.
19. Bello AK, Peters J, Wight J, de Zeeuw D, El Nahas M. A population-based screening for microalbuminuria among relatives of CKD patients: the Kidney Evaluation and Awareness Program in Sheffield (KEAPS). *Am J Kidney Dis* 2008;52:434-43.

20. Greiver M, Drummond N, Birtwhistle R, Queenan J, Lambert-Lanning A, Jackson D. Using EMRs to fuel quality improvement. *Can Fam Physician* 2015;61:92, e68-9.
21. Birtwhistle R, Godwin M, Leggett JA, Martin K. Linking health databases for research. *Can Fam Physician* 2015;61:382, e223-4.
22. Williamson T, Green ME, Birtwhistle R, et al. Validating the 8 CPCSSN case definitions for chronic disease surveillance in a primary care database of electronic health records. *Ann Fam Med* 2014;12:367-72.
23. Godwin M, Williamson T, Khan S, et al. Prevalence and management of hypertension in primary care practices with electronic medical records: a report from the Canadian Primary Care Sentinel Surveillance Network. *CMAJ Open* 2015;3:E76-82.
24. Levin A, Stevens PE. Summary of KDIGO 2012 CKD Guideline: behind the scenes, need for guidance, and a framework for moving forward. *Kidney Int* 2014;85:49-61.
25. Ronksley PE, Tonelli M, Quan H, et al. Validating a case definition for chronic kidney disease using administrative data. *Nephrol Dial Transplant* 2012;27:1826-31.
26. Vlasschaert ME, Bejaimal SA, Hackam DG, et al. Validity of administrative database coding for kidney disease: a systematic review. *Am J Kidney Dis* 2011;57:29-43.
27. Denburg MR, Haynes K, Shults J, Lewis JD, Leonard MB. Validation of The Health Improvement Network (THIN) database for epidemiologic studies of chronic kidney disease. *Pharmacoepidemiol Drug Saf* 2011;20:1138-49.
28. Aref-Eshghi E, Leung J, Godwin M, et al. Low density lipoprotein cholesterol control status among Canadians at risk for cardiovascular disease: findings from the Canadian Primary Care Sentinel Surveillance Network Database. *Lipids Health Dis* 2015;14:60.
29. Birtwhistle RV. Canadian Primary Care Sentinel Surveillance Network: a developing resource for family medicine and public health. *Can Fam Physician* 2011;57:1219-20.
30. Green ME, Natajaran N, O'Donnell DE, et al. Chronic obstructive pulmonary disease in primary care: an epidemiologic cohort study from the Canadian Primary Care Sentinel Surveillance Network. *CMAJ Open* 2015;3:E15-22.
31. Greiver M, Williamson T, Barber D, et al. Prevalence and epidemiology of diabetes in Canadian primary care practices: a report from the Canadian Primary Care Sentinel Surveillance Network. *Can J Diabetes* 2014;38:179-85.
32. Kadhim-Saleh A, Green M, Williamson T, Hunter D, Birtwhistle R. Validation of the diagnostic algorithms for 5 chronic conditions in the Canadian Primary Care Sentinel Surveillance Network (CPCSSN): a Kingston Practice-based Research Network (PBRN) report. *J Am Board Fam Med* 2013;26:159-67.
33. Tonelli M, Wiebe N, Guthrie B, et al. Comorbidity as a driver of adverse outcomes in people with chronic kidney disease. *Kidney Int* 2015.
34. Hemmelgarn BR, Manns BJ, Straus S, et al. Knowledge translation for nephrologists: strategies for improving the identification of patients with proteinuria. *J Nephrol* 2012;25:933-43.
35. Byrne J, Xu G, Carr S. Developing an intervention to prevent acute kidney injury: using the Plan, Do, Study, Act (PDSA) service improvement approach. *J Ren Care* 2015;41:3-8.
36. Feehally J, Couser W, Dupuis S, et al. Nephrology in developing countries: the ISN's story. *Lancet* 2014;383:1271-2.
37. Bello AK, Thadhani R, Hemmelgarn B, et al. Design and implementation of the Canadian Kidney Disease Cohort Study (CKDCS): A prospective observational study of incident hemodialysis patients. *BMC Nephrol* 2011;12:10.

- 1  
2  
3 38. Bello AK, Nwankwo E, El Nahas AM. Prevention of chronic kidney disease: a global  
4 challenge. *Kidney Int Suppl* 2005:S11-7.  
5  
6 39. Kilpatrick ES, Verrill H. A national audit of estimated glomerular filtration rate and  
7 proteinuria reporting in the UK. *Ann Clin Biochem* 2011;48:558-61.  
8  
9 40. Lamb EJ. United Kingdom guidelines for chronic kidney disease. *Scand J Clin Lab Invest*  
10 *Suppl* 2008;241:16-22.  
11  
12 41. Johnson DW, Atai E, Chan M, et al. KHA-CARI guideline: Early chronic kidney disease:  
13 detection, prevention and management. *Nephrology (Carlton)* 2013;18:340-50.  
14  
15 42. Akbari A, Clase CM, Acott P, et al. Canadian Society of Nephrology commentary on the  
16 KDIGO clinical practice guideline for CKD evaluation and management. *Am J Kidney Dis*  
17 2015;65:177-205.  
18  
19 43. Crews DC. Chronic Kidney Disease: A Place for Primary Care and Nephrology to Meet. *J*  
20 *Gen Intern Med* 2015.  
21  
22  
23  
24  
25  
26  
27  
28  
29  
30  
31  
32  
33  
34  
35  
36  
37  
38  
39  
40  
41  
42  
43  
44  
45  
46  
47  
48  
49  
50  
51  
52  
53  
54  
55  
56  
57  
58  
59  
60

**Table 1: Data variables**

| Domain                                 | Variables                                                                                                                                                                                                                                                                                                                                                                                                                                                                                                                                                                                                                                                                                                                                                                                                                                                                                                                                                                                                                                                                                                                            |
|----------------------------------------|--------------------------------------------------------------------------------------------------------------------------------------------------------------------------------------------------------------------------------------------------------------------------------------------------------------------------------------------------------------------------------------------------------------------------------------------------------------------------------------------------------------------------------------------------------------------------------------------------------------------------------------------------------------------------------------------------------------------------------------------------------------------------------------------------------------------------------------------------------------------------------------------------------------------------------------------------------------------------------------------------------------------------------------------------------------------------------------------------------------------------------------|
| Patient Demographics and Clinical Data | <ul style="list-style-type: none"> <li>• Patient ID (unique patient number generated by CPCSSN)</li> <li>• Sex</li> <li>• Month &amp; Year of Birth</li> <li>• Occupation</li> <li>• Highest Education</li> <li>• Housing Status</li> <li>• Postal Code</li> <li>• EMR Status – Active, Deceased, Duplicate, Inactive, Unknown</li> <li>• Language</li> <li>• Race/Ethnicity</li> <li>• Deceased Year</li> <li>• Date Created (date this record was created)</li> <li>• Time Since Last Visit – 6, 12, 24 or 36 months</li> <li>• CPCSSN Conditions – yes / no for diabetes, depression, osteoarthritis, COPD, hypertension, dementia, Parkinson's, epilepsy</li> <li>• CPCSSN Conditions – count (i.e., numeric value)</li> <li>• Disease Case Indicator – disease (diabetes, depression, osteoarthritis, COPD, hypertension, dementia, Parkinson's, epilepsy)</li> <li>• Disease Case Indicator – Indicator Type (billing, encounter diagnosis, health conditions, lab result [HbA1C, fasting glucose], medication)</li> <li>• Disease Case Indicator – Indicator Value (numeric value of HbA1C and/or fasting glucose)</li> </ul> |
| Patient-Provider Pairing               | <ul style="list-style-type: none"> <li>• Patient ID (unique patient number generated by CPCSSN)</li> <li>• Provider ID (unique provider number generated by CPCSSN; primary provider of patient)</li> <li>• Start Date</li> <li>• End Date</li> </ul>                                                                                                                                                                                                                                                                                                                                                                                                                                                                                                                                                                                                                                                                                                                                                                                                                                                                                |
| Provider                               | <ul style="list-style-type: none"> <li>• Provider ID (unique provider number generated by CPCSSN)</li> <li>• Sex</li> <li>• Birth Year</li> </ul>                                                                                                                                                                                                                                                                                                                                                                                                                                                                                                                                                                                                                                                                                                                                                                                                                                                                                                                                                                                    |
| Billing                                | <ul style="list-style-type: none"> <li>• Patient ID (unique patient number generated by CPCSSN)</li> <li>• Date Created</li> <li>• Service Date</li> <li>• Diagnosis Text – cleaned</li> <li>• Diagnosis Text – original</li> <li>• Diagnosis Code Type (i.e., ICD9, ICD10)</li> <li>• Diagnosis Code (i.e., 401)</li> </ul>                                                                                                                                                                                                                                                                                                                                                                                                                                                                                                                                                                                                                                                                                                                                                                                                         |
| Clinical Encounters                    | <ul style="list-style-type: none"> <li>• Patient ID (unique patient number generated by CPCSSN)</li> <li>• Provider ID (unique provider number of the attending provider generated by CPCSSN)</li> <li>• Encounter Date</li> <li>• Encounter Type – academic clinic, community clinic</li> <li>• Reason for visit – cleaned</li> <li>• Reason for visit – original</li> </ul>                                                                                                                                                                                                                                                                                                                                                                                                                                                                                                                                                                                                                                                                                                                                                        |
| Encounter Diagnoses                    | <ul style="list-style-type: none"> <li>• Patient ID (unique patient number generated by CPCSSN)</li> <li>• Created Date</li> <li>• Diagnosis Text – cleaned</li> <li>• Diagnosis Text – original</li> <li>• Diagnosis Code Type (i.e., ICD9)</li> <li>• Diagnosis Code (i.e., 401)</li> </ul>                                                                                                                                                                                                                                                                                                                                                                                                                                                                                                                                                                                                                                                                                                                                                                                                                                        |
| Exam                                   | <ul style="list-style-type: none"> <li>• Patient ID (unique patient number generated by CPCSSN)</li> <li>• Exam Name – systolic BP, diastolic BP, height, weight, BMI, waist circumference, waist hip ratio (all values)</li> <li>• Result – cleaned numeric value</li> <li>• Result – original numeric value</li> <li>• Unit of Measure</li> <li>• Most Recent Value – yes, no</li> </ul>                                                                                                                                                                                                                                                                                                                                                                                                                                                                                                                                                                                                                                                                                                                                           |

|                            |                                                                                                                                                                                                                                                                                                                                                                                                                                                                                                                                                     |
|----------------------------|-----------------------------------------------------------------------------------------------------------------------------------------------------------------------------------------------------------------------------------------------------------------------------------------------------------------------------------------------------------------------------------------------------------------------------------------------------------------------------------------------------------------------------------------------------|
| Health Condition           | <ul style="list-style-type: none"> <li>• Patient ID (unique patient number generated by CPCSSN)</li> <li>• Created Date</li> <li>• Onset Date</li> <li>• Diagnosis Text – cleaned</li> <li>• Diagnosis Text – original</li> <li>• Diagnosis Code Type (i.e., ICD9)</li> <li>• Diagnosis Code (i.e., 401)</li> </ul>                                                                                                                                                                                                                                 |
| Laboratory                 | <ul style="list-style-type: none"> <li>• Patient ID (unique patient number generated by CPCSSN)</li> <li>• Date Performed</li> <li>• Lab Name – cleaned text (fasting glucose, glucose tolerance, HbA1C, HDL, LDL, total cholesterol, triglycerides, microalbumin, urine albumin creatinine ratio, hemoglobin, creatinine, eGFR / GFR)</li> <li>• Lab Name – original text</li> <li>• Lab Result – numeric value</li> <li>• Unit of Measure</li> <li>• Most Recent Value – yes, no</li> </ul>                                                       |
| Medical/Surgical Procedure | <ul style="list-style-type: none"> <li>• Patient ID (unique patient number generated by CPCSSN)</li> <li>• Date Created</li> <li>• Date Performed</li> <li>• Procedure Name – cleaned text</li> <li>• Procedure Name – original text</li> </ul>                                                                                                                                                                                                                                                                                                     |
| Medication                 | <ul style="list-style-type: none"> <li>• Patient ID (unique patient number generated by CPCSSN)</li> <li>• Start Date</li> <li>• Stop Date</li> <li>• Medication Name – cleaned text</li> <li>• Medication Name – original text</li> <li>• Medication Code – ATC code (<i>Anatomical Therapeutic Chemical classification system</i>)</li> <li>• Time Since (initial prescription)</li> <li>• DIN (Drug Identification Number)</li> <li>• Strength</li> <li>• Dose</li> <li>• Frequency</li> <li>• Unit of Measure</li> </ul>                        |
| Referral                   | <ul style="list-style-type: none"> <li>• Patient ID (unique patient number generated by CPCSSN)</li> <li>• Date Created</li> <li>• Date Completed</li> <li>• Referral Name – cleaned text</li> <li>• Referral Name – original text</li> </ul>                                                                                                                                                                                                                                                                                                       |
| Risk Factor                | <ul style="list-style-type: none"> <li>• Patient ID (the unique patient number generated by CPCSSN)</li> <li>• Date Created</li> <li>• Start Date</li> <li>• Stop Date</li> <li>• Most Recent – yes, no</li> <li>• Risk Factor Name – cleaned text (smoking, alcohol, diet, exercise, obesity)</li> <li>• Risk Factor Name – original text</li> <li>• Status – cleaned (current, never, n/a, not current, past, unknown)</li> <li>• Status – original</li> <li>• Value – cleaned</li> <li>• Frequency</li> <li>• Duration</li> <li>• End</li> </ul> |

Abbreviations: BMI, body mass index; BP, blood pressure; COPD, chronic obstructive pulmonary disease; CPCSSN, Canadian Primary Care Sentinel Surveillance Network; eGFR, estimated glomerular filtration rate; EMR, electronic medical records; HbA1C, glycated hemoglobin concentration; HDL, high density lipoprotein; LDL, low density lipoprotein



**Table 2: Elements of high quality CKD care as defined by standard national and international CKD Guidelines<sup>24,39-43</sup>**

| Domain                                                                | Objective                                                                                                                                                                                                                      | Measures                                                                                                                                                                                                                                                                                                                                                                                                                                                                                                                                                                                                                                                                                                                                                                                                                                                                                                                                                                                                                                                                                                                                                                                                                                                                                                                                                                                                                                                                                                                                                                                                   |
|-----------------------------------------------------------------------|--------------------------------------------------------------------------------------------------------------------------------------------------------------------------------------------------------------------------------|------------------------------------------------------------------------------------------------------------------------------------------------------------------------------------------------------------------------------------------------------------------------------------------------------------------------------------------------------------------------------------------------------------------------------------------------------------------------------------------------------------------------------------------------------------------------------------------------------------------------------------------------------------------------------------------------------------------------------------------------------------------------------------------------------------------------------------------------------------------------------------------------------------------------------------------------------------------------------------------------------------------------------------------------------------------------------------------------------------------------------------------------------------------------------------------------------------------------------------------------------------------------------------------------------------------------------------------------------------------------------------------------------------------------------------------------------------------------------------------------------------------------------------------------------------------------------------------------------------|
| Identification of CKD risk factors                                    | To establish an organized system for identification of people with risk factors, and evaluated for the presence of CKD markers                                                                                                 | Percentage of patients with risk factors* (present for at least 1 year) tested for CKD within the last 12 months                                                                                                                                                                                                                                                                                                                                                                                                                                                                                                                                                                                                                                                                                                                                                                                                                                                                                                                                                                                                                                                                                                                                                                                                                                                                                                                                                                                                                                                                                           |
| Identification of CKD                                                 | To establish an organized system where people with CKD are appropriately identified                                                                                                                                            | Proportion of patients with CKD correctly diagnosed and appropriately coded (validated based on KDIGO definition standard of using Scr measurements to derive eGFR<60mls/min based on 2 measures at least 90 days apart based on CKD-EPI equation.                                                                                                                                                                                                                                                                                                                                                                                                                                                                                                                                                                                                                                                                                                                                                                                                                                                                                                                                                                                                                                                                                                                                                                                                                                                                                                                                                         |
| Management of CKD: Monitoring of risk factors for progression and CVD | To establish an organized system to ensure CKD patients are receiving guideline-concordant care appropriate for the stage of CKD. This implies that those with early stages are being monitored appropriately in primary care. | <p>Proportion of patients receiving appropriate testing and monitoring:</p> <ul style="list-style-type: none"> <li>- Percentage of patients with urinary albumin tested within 6 months of Index GFR&lt;60 ml/min/1.73m<sup>2</sup></li> <li>- Percentage of patients with Index GFR&lt;60ml/min/1.73m<sup>2</sup> and diabetes mellitus who have glycated hemoglobin tested at least annually</li> <li>- Frequency of eGFR and albuminuria testing in patients with a baseline of eGFR&lt;60mls/min and/or ACR of 70mg/mmol (&lt;1 year, 1-2 years, &gt;2 years)</li> </ul> <p>Proportion of patients receiving appropriate cardiovascular risk management:</p> <ul style="list-style-type: none"> <li>- Percentage of patients &gt;50 years of age and eGFR&lt;45mls/min and/or CVD history on a statin medication</li> <li>- Percentage of patients with diabetes and proteinuria on an ACEi or ARB</li> <li>- Percentage of patients with history of CVD on appropriate secondary prevention (Aspirin, beta-blocker, ACEi, statin)</li> </ul> <p>Proportion of patients achieving treatment targets (BP, proteinuria, HbA1c).</p> <ul style="list-style-type: none"> <li>- Percentage of patients with diabetes and/or proteinuria (ACR&gt;70mg/mmol) achieving a target BP of ≤130/80mmHg</li> <li>- Percentage of patients with eGFR&lt;60mls/min achieving a target BP of ≤140/90mmHg</li> <li>- Percentage of patients with proteinuria (ACR&gt;70mg/mmol) achieving a target reduction to 50% of baseline</li> <li>- Percentage of patients with diabetes achieving a target HbA1c ~7%</li> </ul> |
| Appropriate referral system                                           | To develop a system where CKD patients that need specialist input to care are appropriately identified and referred.                                                                                                           | Proportion of patients appropriately referred for specialist care (defined by any visit to nephrologist or multi-disciplinary CKD clinic within the last 12 months, for those patients that meet the KDIGO referral criteria**)                                                                                                                                                                                                                                                                                                                                                                                                                                                                                                                                                                                                                                                                                                                                                                                                                                                                                                                                                                                                                                                                                                                                                                                                                                                                                                                                                                            |

\* Diabetes, hypertension, cardiovascular disease, nephrotoxic meds (NSAIDs, calcineurin inhibitors, lithium), certain urological disease (e.g., kidney stones, prostatic hypertrophy), multi-system diseases (e.g., lupus) and family history of kidney disease

\*\* This would include advanced stages of CKD (eGFR<30-45 ml/min/1.73m<sup>2</sup>), significant albuminuria (albumin: creatinine ratio ≥70 mg/mmol), rapid loss of eGFR, refractory hypertension and history of acute kidney injury.

Abbreviations: ACR, albumin: creatinine ratio; ACEi, angiotensin converting enzyme inhibitor; ARB, angiotensin-receptor blocker; BP, blood pressure; CKD, chronic kidney disease; CVD, cardiovascular disease; eGFR, estimated glomerular filtration rate; HbA1c, glycated hemoglobin concentration; KDIGO, Kidney Disease Improving Global Outcomes. Scr=serum creatinine.

Figure 1: Map of Canada showing CPCSSN Networks Distribution

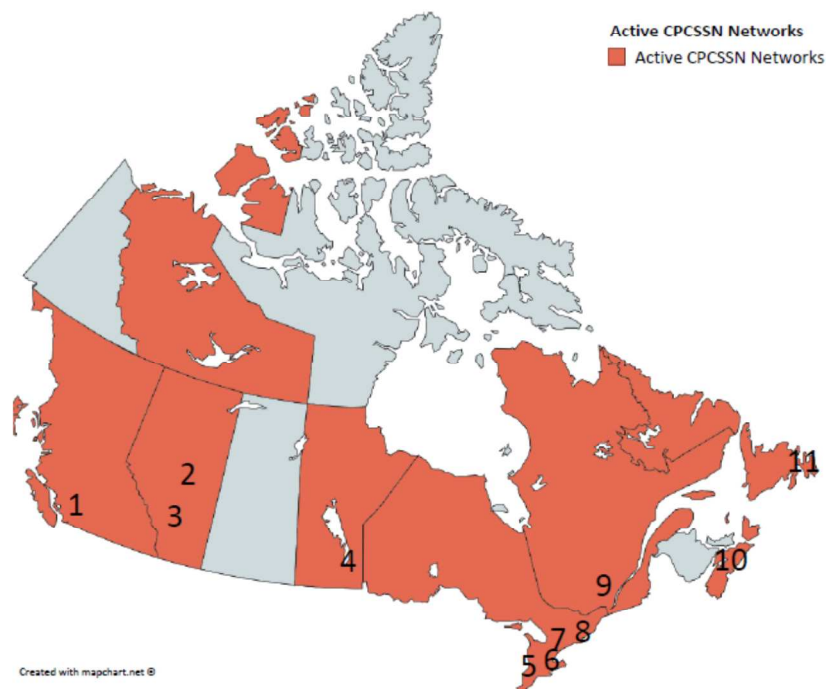

Figure legend: Map of Canada showing the distribution of primary care research networks contributing data to the CPCSSN:

1. British Columbia Primary Care Research Network (BCPCReN)
2. Northern Alberta Primary Care Research Network (NAPCRen)
3. Southern Alberta Primary Care Research Network (SAPCRen)
4. Manitoba Primary Care Research Network (MaPCReN)
5. DELPHI (Deliver Primary Healthcare Information) Project
6. McMaster University Sentinel and Information Collaboration (MUSIC)
7. University of Toronto Practice Based Research Network (UTOPIAN)
8. The Eastern Ontario Network (EON)
9. Réseau de recherche en soins primaires de l'Université de Montréal (RRSPUM)
10. Maritime Family Practice Research Network (MaRNet-FP)
11. Atlantic Practice Based Research Network (APBRN)

only

1  
2  
3  
4  
5  
6  
7  
8  
9  
10  
11  
12  
13  
14  
15  
16  
17  
18  
19  
20  
21  
22  
23  
24  
25  
26  
27  
28  
29  
30  
31  
32  
33  
34  
35  
36  
37  
38  
39  
40  
41  
42  
43  
44  
45  
46  
47  
48  
49  
50  
51  
52  
53  
54  
55  
56  
57  
58  
59  
60

Figure 2: The concept

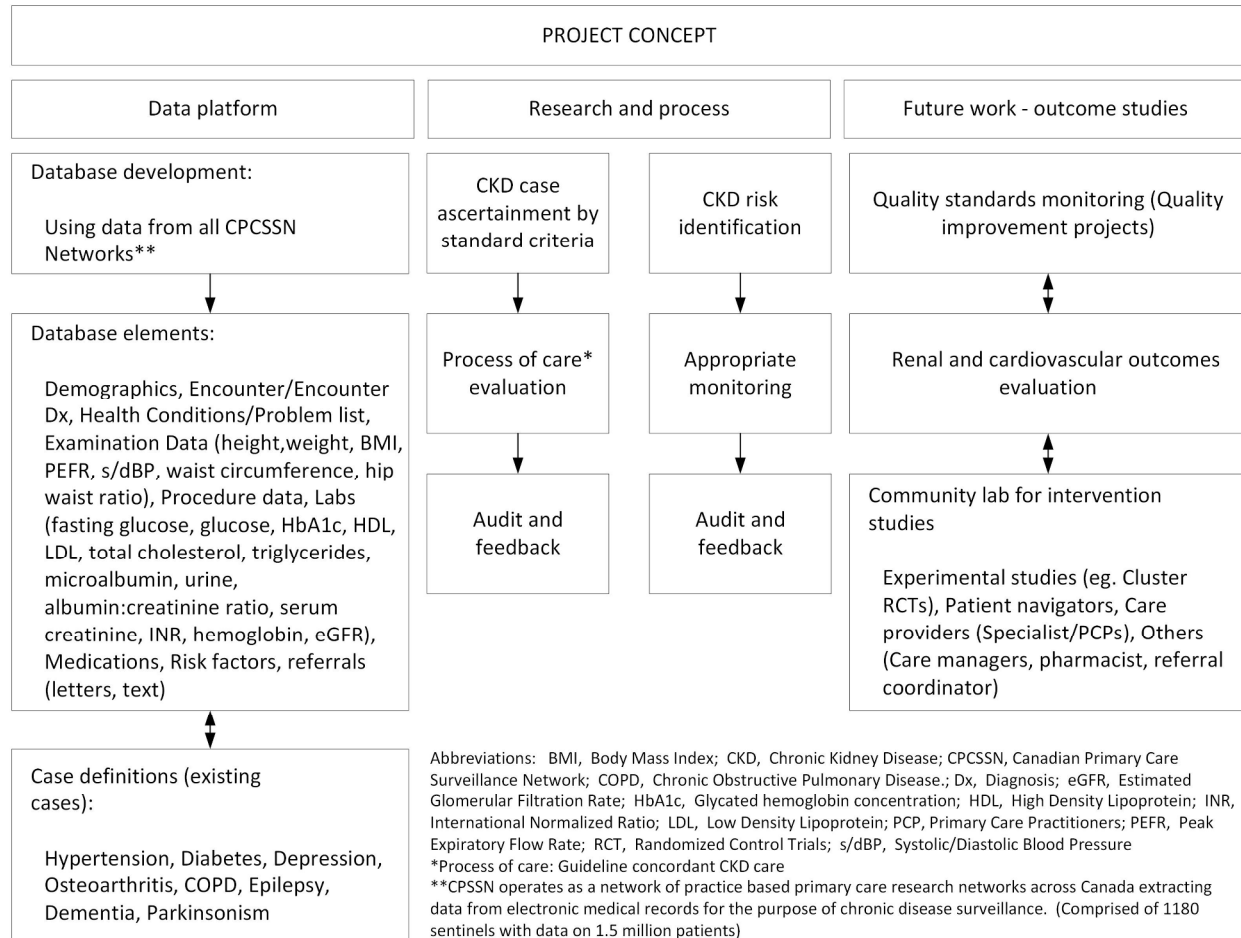

Figure 3: Project timeline/milestones

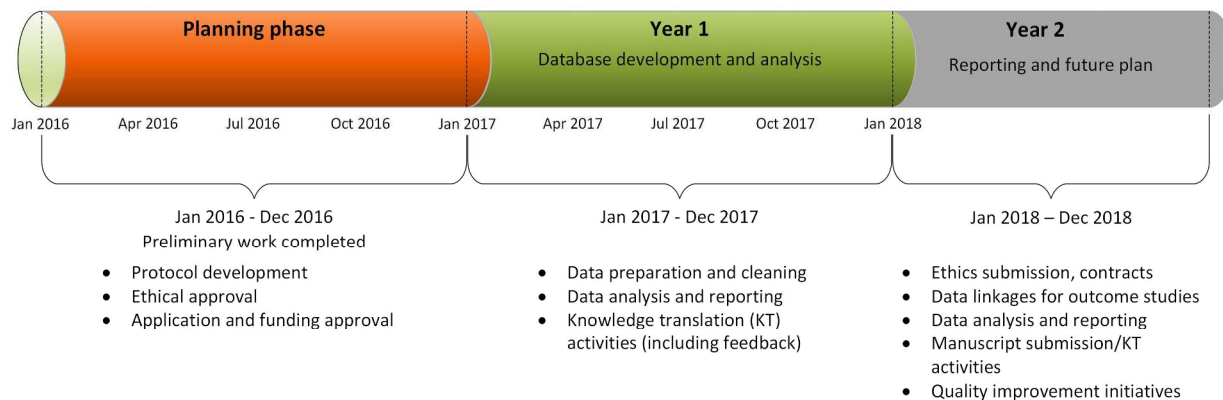

# BMJ Open

## Improving CKD management in primary care using the Canadian Primary Care Sentinel Surveillance Network: Study protocol of a retrospective observational study

|                                    |                                                                                                                                                                                                                                                                                                                                                                                                                                                                                                                                                                                                                                                                                                                                                                                                                                                                                                                                              |
|------------------------------------|----------------------------------------------------------------------------------------------------------------------------------------------------------------------------------------------------------------------------------------------------------------------------------------------------------------------------------------------------------------------------------------------------------------------------------------------------------------------------------------------------------------------------------------------------------------------------------------------------------------------------------------------------------------------------------------------------------------------------------------------------------------------------------------------------------------------------------------------------------------------------------------------------------------------------------------------|
| Journal:                           | <i>BMJ Open</i>                                                                                                                                                                                                                                                                                                                                                                                                                                                                                                                                                                                                                                                                                                                                                                                                                                                                                                                              |
| Manuscript ID                      | bmjopen-2017-016267.R1                                                                                                                                                                                                                                                                                                                                                                                                                                                                                                                                                                                                                                                                                                                                                                                                                                                                                                                       |
| Article Type:                      | Protocol                                                                                                                                                                                                                                                                                                                                                                                                                                                                                                                                                                                                                                                                                                                                                                                                                                                                                                                                     |
| Date Submitted by the Author:      | 03-May-2017                                                                                                                                                                                                                                                                                                                                                                                                                                                                                                                                                                                                                                                                                                                                                                                                                                                                                                                                  |
| Complete List of Authors:          | Bello, A; University of Alberta, Edmonton, Alberta, Canada. , Medicine<br>Ronksley, Paul; University of Calgary, Community Health Sciences<br>Tangri, Navdeep; University of Manitoba, Medicine<br>Singer , Alexander; University of Manitoba College of Medicine, Department<br>of Family Medicine ; Manitoba Primary Care Research Network<br>Grill, Allan; University of Toronto<br>Nitsch, Dorothea; LSHTM<br>Queenan, John; Queen's University in Kingston, ON, Canada<br>Lindeman, Cliff; University of Alberta, Family Medicine<br>Soos, Boglarka; University of Calgary, Calgary, AB, Canada, Family<br>Medicine<br>Freiheit, Elizabeth; University of Michigan, Ann Arbor, MI, United States,<br>Institute for Social Research<br>Tuot, Delphine; University of California, San Francisco<br>Mangin, Dee ; McMaster University, Family Medicine<br>Drummond, Neil ; University of Alberta, Edmonton, AB, Canada, Family<br>Medicine |
| <b>Primary Subject<br>Heading</b>: | Renal medicine                                                                                                                                                                                                                                                                                                                                                                                                                                                                                                                                                                                                                                                                                                                                                                                                                                                                                                                               |
| Secondary Subject Heading:         | Epidemiology, Evidence based practice, General practice / Family practice,<br>Health informatics, Health services research                                                                                                                                                                                                                                                                                                                                                                                                                                                                                                                                                                                                                                                                                                                                                                                                                   |
| Keywords:                          | Protocols & guidelines < HEALTH SERVICES ADMINISTRATION &<br>MANAGEMENT, Quality in health care < HEALTH SERVICES<br>ADMINISTRATION & MANAGEMENT, Nephrology < INTERNAL MEDICINE,<br>Chronic renal failure < NEPHROLOGY                                                                                                                                                                                                                                                                                                                                                                                                                                                                                                                                                                                                                                                                                                                      |
|                                    |                                                                                                                                                                                                                                                                                                                                                                                                                                                                                                                                                                                                                                                                                                                                                                                                                                                                                                                                              |

SCHOLARONE™  
Manuscripts

1  
2  
3  
4  
5  
6  
7  
8  
9  
10  
11  
12  
13  
14  
15  
16  
17  
18  
19  
20  
21  
22  
23  
24  
25  
26  
27  
28  
29  
30  
31  
32  
33  
34  
35  
36  
37  
38  
39  
40  
41  
42  
43  
44  
45  
46  
47  
48  
49  
50  
51  
52  
53  
54  
55  
56  
57  
58  
59  
60

# Improving CKD management in primary care using the Canadian Primary Care Sentinel Surveillance Network: Study protocol of a retrospective observational study

Aminu K Bello<sup>1</sup>, MD, PhD, FRCP, Paul E. Ronksley<sup>2</sup>, BSc, MSc, PhD, Navdeep Tangri<sup>3</sup> MD, PhD, FRCPC, Alex Singer<sup>4</sup>, MB BAO BCh. CCFP, Allan Grill<sup>5</sup>, MD, CCFP, MPH, Dorothea Nitsch<sup>6</sup> MD, Dr Med, MSci, John A Queenan<sup>7</sup>, PhD, Cliff Lindeman<sup>8</sup>, BSc, MPH, Larka Boglarka Soos<sup>9</sup> BSc, MMath, Elizabeth Freiheit<sup>10</sup> BSc, PhD, Delphine Tuot<sup>11</sup> MD, Dee Mangin<sup>12</sup> MBChB, DPH, FRNZCGP, Neil Drummond<sup>13</sup> PhD

<sup>1</sup>Department of Medicine, University of Alberta, Edmonton, AB, Canada

<sup>2</sup>Department of Community Health Sciences, University of Calgary, Calgary, AB, Canada.

<sup>3</sup>Department of Medicine, University of Manitoba, Winnipeg, MB, Canada

<sup>4</sup>Department of Family Medicine, University of Manitoba, Winnipeg, MB, Canada

<sup>5</sup>Department of Family and Community Medicine, University of Toronto, Toronto, ON, Canada

<sup>6</sup>Department of Non-Communicable Disease Epidemiology, London School of Hygiene & Tropical Medicine, London, UK

<sup>7</sup>Epidemiologist for the Canadian Primary Care Sentinel Surveillance Network, Department of Family Medicine, Queen's University in Kingston, ON, Canada

<sup>8</sup>Department of Family Medicine, University of Alberta, Edmonton, AB, Canada

<sup>9</sup>Department of Family Medicine, University of Calgary, Calgary, AB, Canada

<sup>10</sup>Institute for Social Research, University of Michigan, Ann Arbor, MI, United States

<sup>11</sup>Department of Medicine, UCSF School of Medicine, San Francisco, CA, United States

<sup>12</sup>Department of Family Medicine, McMaster University, Hamilton, ON, Canada

<sup>13</sup>Department of Family Medicine, University of Alberta, Edmonton, AB, Canada

## Corresponding Author:

Aminu K Bello, MD PhD, FRCP

Division of Nephrology and Immunology

Department of Medicine

University of Alberta

11-107 Clinical Sciences Building, 8440 112 Street NW, Edmonton, Alberta, Canada T6B 2B7

Email: aminu1@ualberta.ca

Telephone: 780-492-1867

Fax: 780-407-7771

## Word Count

Abstract: 302

Main Text: (excluding abstract, references, tables, and figure): 2958

**Running title:** CKD Management in Canadian Primary Care

## ABSTRACT

**Introduction:** Effective chronic disease care is dependent on well-organized quality improvement (QI) strategies that monitor processes of care and outcomes for optimal care delivery. Although healthcare is provincially/territorially structured in Canada, there are national networks such as the Canadian Primary Care Sentinel Surveillance Network (CPCSSN) as important facilitators for national QI-based studies to improve chronic disease care. The goal of our study is to improve the understanding of how patients with chronic kidney disease (CKD) are managed in primary care and the variation across practices and provinces to drive improvements in care delivery.

**Methods and analysis:** The CPCSSN database contains anonymized health information from the electronic medical records for patients of participating primary care practices (PCPs) across Canada (N=1200). The dataset includes information on patient socio-demographics, medications, laboratory results and comorbidities. Leveraging validated algorithms, case definitions and guidelines will help define CKD and the related processes of care, and enable us to: 1) ascertain the burden of CKD in primary care; 2) determine the current practice pattern on CKD risk identification in primary care; and 3) investigate the variation in care indicators (e.g. achievement of blood pressure [BP] and proteinuria targets) across patients' demographics and provider and regional characteristics. The prevalence of CKD stages 3-5 will be presented as age-sex standardized prevalence estimates stratified by province and as weighted averages for population rates with 95% confidence intervals (CI) using census data. For each PCP, age-sex standardized prevalence will be calculated and compared with expected standardized prevalence estimates. The process-based outcomes will be defined using established methods.

**Ethics and dissemination:** The CPCSSN is committed to high ethical standards when dealing with individual data collected, and this work is reviewed and approved by the Network Scientific Committee. The results will be published in peer-reviewed journals and presented at relevant national and international scientific meetings.

### Strengths and limitations of this study

- To our knowledge, this is the first nationwide and largest retrospective observational study on the epidemiology and management of CKD in primary care in Canada with potential to identify opportunities for improving quality of care for CKD at a national level.
- It will define the practice patterns on CKD risk identification in primary care by ascertaining whether high-risk groups are appropriately tested, monitored, and managed for CKD based on existing guideline recommendations.
- It will investigate the variation in CKD care delivery across patient, provider, and regional characteristics, relative to established quality indicators.
- This study leverages retrospective data collated at point of care, and therefore limitations include variable data quality and incomplete information in some data domains.
- The results of this study will enable the development of strategies and interventions to improve care and outcomes for patients with CKD.

## INTRODUCTION

There is an absence of effective surveillance mechanisms for chronic kidney disease (CKD) in most countries despite the overwhelming opinion of key stakeholders supporting such developments.<sup>1,2</sup> There are a few countries in the world with a well-established CKD surveillance systems (Australia, Japan, UK and USA).<sup>1,3</sup> As with all other non-communicable diseases (NCDs), planning, development and implementation of effective and efficient care programs require reliable national data systems to monitor the burden of disease, processes of care and clinical outcomes.<sup>4-12</sup> Once established, these systems can be used for routine surveillance (including secular trends), quality improvement and resource allocation (including workforce planning). In Canada, they would also allow for within-country comparisons across provinces and territories, and evaluation of how the country compares with similar nations in CKD care. If combined with existing data sources (e.g., administrative databases), data on CKD management in primary care might also facilitate efforts to integrate CKD management with care for other major NCDs (e.g., diabetes, cardiovascular diseases, hypertension, obesity).<sup>5</sup>

Effective and sustainable chronic disease care is dependent on well-organized quality improvement (QI) strategies to monitor processes of care and outcomes and inform optimal care delivery.<sup>1</sup> In the CKD domain, end-stage renal disease (ESRD) care has been the sole focus of national QI activities, often administered in conjunction with national/regional registries (e.g., Canadian Organ Replacement Register, United States Renal Data System, European Renal Registry).<sup>1,5</sup> While there is no surveillance system for non-dialysis-dependent CKD in most countries, including Canada,<sup>5,13</sup> a few have developed initiatives in this direction.<sup>14 1,5,13,15</sup> A national CKD surveillance system using routinely collected practice data is feasible in nations with well-developed healthcare systems as CKD lends itself particularly well to surveillance because of its laboratory-based diagnosis.<sup>16</sup> Although healthcare is provincially/territorially structured and administered in Canada, there are existing national networks and collaborations such as the Canadian Primary Care Sentinel Surveillance Network (CPCSSN)<sup>17</sup> that can be important facilitators for national QI-based studies.

We set out to improve the understanding of how patients with CKD are managed and the variation across practitioners, regions, and provinces to drive improvements in care delivery. Our study is a multidisciplinary (nephrology, primary care) and cross-jurisdictional effort leveraging data from the CPCSSN to investigate the epidemiology and management of CKD in the Canadian primary care system. The overarching aim is to use data derived from primary care electronic medical records (EMRs) to identify gaps in care, and provide opportunities for interventions to improve care and patient outcomes.

### Objectives:

1. Develop and validate a case definition for CKD in primary care and apply this to ascertain the burden of CKD in primary care, obtaining data on unidentified cases using standard criteria.<sup>18,19</sup>
2. Determine the current practice patterns on CKD risk identification in primary care by ascertaining whether high-risk groups (e.g., individuals with diabetes, hypertension, and urologic disorders, and those with chronic use of nephrotoxic medications) are appropriately screened and managed for CKD.



3. Determine whether people with CKD are being managed based on established quality indicators, and investigate the care variation across patients' demographics (age, sex, socio-economic status, rural/urban residence, comorbidity burden), provider characteristics (family physician/nurse practitioner, year of graduation, rural/urban, individual/group, fee for service) and regional characteristics (intra- and inter-provincial/territorial variation, rural versus urban).

## METHODS AND ANALYSIS

### Setting

The CPCSSN<sup>17,20,21</sup> is the first pan-Canadian multi-disease surveillance system. The data resources profile and context within the Canadian health system are detailed elsewhere.<sup>22</sup> Canada is considered a high-income country by the World Bank Classification Index with a population of 35,362,905 (2016). It is the second largest country in the world with a land area of 9,984,670 sq km. It has a GDP of \$1.634 trillion (2016), and about 10.1% of this is spent on healthcare. In Canada, health care is a provincial or territorial mandate under the oversight of the Canada Health Act and with financial assistance from the federal government ensuring universal, publicly funded health services to the population for medically-necessary care including physician visits, hospitalizations and, in some provinces universal drug coverage. Primary care is the first portal for accessing care particularly for routine chronic disease care.

The structure of CPCSSN comprised of a network of twelve practice-based primary care research networks that collect primary care health information from the EMRs of primary care providers (PCPs) in eight out of the ten provinces and one out of the three territories in the country (**Figure 1**). There are 1180 sentinels (i.e., participating PCPs) contributing data to the CPCSSN, which is updated quarterly. This actively expanding repository currently contains data on approximately 1.5 million Canadians. The initial focus of the CPCSSN was to conduct surveillance on five chronic conditions: diabetes, hypertension, osteoarthritis, chronic obstructive pulmonary disease, and depression. Subsequently, it was expanded to include three neurological conditions: dementia, epilepsy, and Parkinson's disease. Our project team has been instrumental in working with CPCSSN to further expand on these conditions by including CKD, and this work on CKD will be conducted from January 2017 to December 2018. It will take place under the auspices of the Alberta's Strategy for Patient Oriented Research (SPOR)- Primary and Integrated Health Care Innovation Network (PIHCIN).

### Population and data sources

Data for the CPCSSN database are extracted from the EMRs of participating sentinels, rendered anonymous, coded and processed using established frameworks described in detail elsewhere.<sup>21,23</sup> The data are placed in regional network databases and then merged into the national repository. It is made available for surveillance and research, and increasingly for quality improvement projects and for clinical decision support where available, through the implementation of a patient re-identification tool held only within the custodial clinics themselves. With appropriate data sharing agreements with its sentinel PCPs, CPCSSN data may

1  
2  
3 be linked with administrative health data for future work to follow up on CKD-related outcomes  
4 (e.g., ascertainment of progression to dialysis requirement using registry data).  
5  
6

7 The CPCSSN database will be used to develop a cohort of CKD patients being managed in  
8 primary care between January 1, 2010 and December 31, 2015 (baseline cohort), and from  
9 January 1, 2016 onwards (open cohort). The database is updated quarterly, allowing for  
10 identification of new CKD patients who meet the inclusion criteria during the study period. The  
11 CPCSSN database contains patient information on socio-demographics (age, sex, socio-  
12 economic status (calculated deprivation category)), treatment (medications data), laboratory  
13 results and comorbidities (**Table 1, Figure 2**).<sup>21,24</sup> Patients under 18 years of age will be  
14 excluded from the cohorts, as will those diagnosed with ESRD and on dialysis or having renal  
15 transplant. We will leverage validated algorithms, case definitions and guidelines to define CKD,  
16 at-risk population and processes of care measures based on established methods and criteria  
17 (**Table 2**).<sup>25,26,27</sup>  
18  
19  
20

### 21 **Identification of CKD**

22 The major focus is to validate a case definition for CKD in primary care using the CPCSSN  
23 repository to enable us to identify patients with CKD. We will leverage the existing frameworks  
24 and conventions by national and international CKD guidelines, and definitions used  
25 elsewhere.<sup>26,28</sup> Serum creatinine (Scr) measurements will be used to calculate using CKD-EPI  
26 equation.<sup>29</sup> Individuals with at least one face-to-face PCP encounter and two calculated eGFR  
27 values  $<60$  ml/min per  $1.73$  m<sup>2</sup>  $>90$  days apart or having an International Classification of  
28 Diseases (ICD-9) diagnosis code for CKD used at least twice in an outpatient encounter as of  
29 December 31, 2015, will be defined to have CKD. We recognize the significant limitations of the  
30 ICD-9 codes when applied for CKD identification in the community, however, its use will allow  
31 us to capture those patients with CKD who may or may not have had an abnormal eGFR, for  
32 example cystic kidney diseases and other rare congenital disorders. In a secondary analysis,  
33 CKD will be defined by  $eGFR < 45$  ml/min/ $1.73$  m<sup>2</sup> using two values of eGFR  $>90$  days apart.  
34 This definition was selected because although  $GFR < 60$  ml/min/ $1.73$  m<sup>2</sup> constitutes CKD,  
35 individuals with GFR between 45 and 60 ml/min/ $1.73$  m<sup>2</sup> usually have favorable prognosis in the  
36 absence of proteinuria, and are substantially fewer in number than those with  
37  $GFR < 45$  ml/min/ $1.73$  m<sup>2</sup>. Patients with  $eGFR < 45$  ml/min/ $1.73$  m<sup>2</sup> are also a more attractive  
38 population for intervention due to higher risk of adverse clinical outcomes including risk of  
39 progression to ESRD<sup>2,14</sup>. Validation of the primary care CKD case definition algorithm will  
40 consist of an expert blinded chart review and identification of cases in a random sample of 1000  
41 CPCSSN charts, containing both original and cleaned text data from the EMRs for patients aged  
42 18 years or older, and comparison with the outcome of an independent search of the same sample  
43 using the CPCSSN case finding algorithm. Analysis will consist of calculations of sensitivity,  
44 specificity, and positive and negative predicted values. The prevalence of CKD stages 3-5 will be  
45 presented as unadjusted prevalence estimates and weighted averages for population rates with  
46 95% confidence intervals (CI) using the census data, and stratified by PCP, rural/urban location  
47 and province or territory.  
48  
49  
50  
51  
52  
53  
54  
55  
56  
57  
58  
59  
60

## Evaluation of processes of care

The process-based outcomes (quality of care metrics) will be defined and evaluated using established methods across key domains of risk identification and case finding for CKD, as well as delivery of appropriate management including monitoring of risk factors for progression and cardiovascular disease (CVD), and referral for specialist nephrology care where necessary (Table 2). We are specifically focusing on the key domains of CKD management in primary care that include:

- CKD risk identification. This entails the evaluation of the proportion of patients with risk factors (diabetes and/or hypertension) present for at least 1 year that are tested for CKD within the previous 12 months of follow up.
- Identification of CKD. This is to determine the proportion of patients with CKD (defined based on laboratory measures), and correctly coded as having CKD in the EMR using defined clinical parameters.
- Management of CKD: This examines the current state of practice on the management of the common risk factors (BP, glycemia, proteinuria, dyslipidemia) associated with CKD progression and/or risk of CKD. For example, ascertaining the proportion of patients achieving guideline-concordant treatment targets (BP, proteinuria, HbA1c).
- Appropriate referral. This is to capture the proportion of patients appropriately referred for specialist kidney care (defined by any visit to nephrologist or multi-disciplinary CKD clinic within the last 12 months) based on guideline-concordant criteria for referral.

## Data analysis

### *Covariates definition and evaluation of CKD markers*

Socio-demographic, clinical, laboratory and medication data will be classified using standard definitions established by the CPCSSN.<sup>17,24,30-34</sup> Other comorbid conditions relevant to the care of CKD patients but not defined by the CPCSSN (coronary artery disease, stroke, peripheral vascular disease, heart failure) will be identified using standard procedures to search for those diagnoses in patients' medical records (based on validated ICD-9-CM coding algorithms<sup>35</sup>). Baseline kidney function (using estimated glomerular filtration rate, eGFR) will be calculated using all serum creatinine measurements taken within a six-month period of the first creatinine measurement, with the index eGFR defined as the mean of the six-month measurements. Assessment of urine protein excretion will be estimated using the albumin: creatinine ratio (ACR) based on spot urine measurements using standard conventions.<sup>25</sup> All CKD cases will be risk-stratified, defined and classified according to current guideline recommendations.<sup>25</sup> Demographic information (including age, sex and postal code) of those with and at risk of CKD will be extracted (**Tables 1 & 2**). Normally distributed variables will be summarized as means with standard deviations (SD), and non-normally distributed data will be summarized as medians with interquartile ranges (IQR). Dichotomous data will be expressed in percentages. The representativeness of the study population will be tested by comparing their age and sex profiles to the population distribution as reported in the Canadian 2011 Census (adjusting for 2016 census data when available).

## ETHICS AND DISSEMINATION

The CPCSSN is committed to high ethical standards when handling individual patient data collected from EMRs of participating PCPs from across Canada. These data are aggregated and stored in CPCSSN's central repository at the Centre for Advanced Computing, Queens University in Kingston, Ontario. There are well-developed organizational, physical and technological safeguards at all levels (clinic, provincial, national) to ensure that the privacy of patients is protected and that all collection, retention, use or disclosure of data complies with applicable privacy legislation and ethical requirements.<sup>17,21</sup> All personal identifiers are removed from the data in the national research repository to protect patient confidentiality.<sup>21</sup> The protocol has undergone a scientific review and approval by the CPCSSN Surveillance and Research Standing Committee (SRSC), and ethical approval for the study was granted by the University of Alberta Health Research Ethics Committee.

This project uses an integrated knowledge translation (KT) strategy, where relevant stakeholders (patients, practitioners, policymakers) have been involved from inception (proposal development) to ensure that the project addresses the needs of patients and practitioners. The activities underpinning the Alberta SPOR PIHCIN center around the patients and are patient-oriented, where the voices and perspectives of patients are solicited from research inception (e.g. defining research questions) to completion. The patients are collaborators rather than research subjects, and we have a patient representative on the project team to ensure patients voices and perspectives guide the work to completion, and that it remains patient-centered.

The involvement of the knowledge end-users (practitioners and policymakers) and the high priority that they place on the project will ensure that we drive it forward to completion and provide an opportunity to meaningfully change the way that care is delivered to CKD patients managed in primary care. For example, after identifying regions/clusters with especially suboptimal CKD care, we will collaborate with providers, policymakers and regional health authorities to improve care in those regions. We will apply the KT Canada Knowledge-to-Action Cycle Framework and other established methods (e.g., PDSA (Plan, Do, Study, Act) concept) to disseminate our findings to all relevant stakeholders and end-users for action.<sup>36,37</sup> We will leverage our collaborations with existing platforms and research networks such as the Canadian Society of Nephrology, CANN-NET (CANadian KidNey KNowledge TraNslation and GEneration NeTwork), Can-SOLVE CKD (Canadians Seeking Solutions and Innovations to Overcome Chronic Kidney Disease) and the country-wide Primary and Integrated Healthcare Innovation Networks to ensure the translation of our findings across provinces and territories, as well as internationally through our associations with the International Society of Nephrology and the Kidney Disease Improving Global Outcomes (KDIGO) team.<sup>5,38</sup> The results will be published in leading general medicine, nephrology and primary care peer-reviewed journals and presented at relevant national and international scientific meetings. A performance report will be produced against the indicators relevant to each objective, aggregated by practice sentinel, to highlight practice performance and map out areas for improvement, critical for continuing professional development of PCPs and helping to enhance CKD management in primary care. In future, this database will be linked to the Canadian Organ Replacement Registry and relevant

1  
2  
3 provincial administrative databases to study clinically-relevant outcomes of risk and progression  
4 to kidney failure (ESRD) and adverse cardiovascular outcomes<sup>39,40</sup> (**Figure 3**).

5  
6  
7 This work will close the information gap between observed and expected burdens and risks of  
8 CKD and map out standards of care achieved, providing opportunities for focused and effective  
9 population-level QI strategies and other service improvement initiatives. This project will  
10 demonstrate proof of concept for an early identification and management of CKD program in  
11 primary care, and provide the basis for developing relevant policies and KT strategies to enhance  
12 the uptake of findings – for people with CKD, and other chronic diseases as well. The work will  
13 facilitate identification and appropriate management of CKD patients at high risk of progression  
14 to ESRD. The findings will be reported based on existing reporting frameworks.<sup>41</sup>

15  
16  
17 We have anticipated potential threats and have devised strategies to mitigate them. The first  
18 related to feasibility within the defined timeframe (**Figure 3**). This is unlikely to hinder the  
19 success of the project as we have completed significant preliminary work for data access, and the  
20 team has considerable experience with the use of this kind of data for policy-relevant  
21 research.<sup>5,19,36,42,43</sup> Second, limitations general to the use of EMR data in research are  
22 acknowledged. The collated information is based on clinical encounters and needs, and thus may  
23 be missing for some important key variables and data quality may vary by region and/or sentinel;  
24 specifically, data on patients' priorities and satisfaction of care are rarely collated in a clinical  
25 setting. However, most important demographic, clinical and laboratory information needed for  
26 this study are well captured in the existing platform chosen for this work. Third, lack of use of  
27 patient-reported outcomes measures such as satisfaction with care, self-management support, etc  
28 could not be included as these were not routinely collated in this database.

## 32 33 CONCLUSIONS

34 Planning, development, and implementation of nephrology services require reliable information  
35 systems and databases to capture information on trends in disease burden, processes of care and  
36 related outcomes. In the absence of national/regional health information systems, one way to  
37 achieve this is by the creation of surveillance systems using routine practice data, such as the  
38 CPCSSN and those established specifically for CKD in other jurisdictions across the world  
39 (Table 3). The established conventions and guidelines on CKD can be leveraged for systematic  
40 case definition and evaluation of quality of care across settings. This can be facilitated by  
41 validation as well as enactment of quality metrics to measure the processes, quality of care and  
42 related outcomes, and generate uniformity across databases which may permit analyses across  
43 countries and regions. It is important to detect CKD early enough to be able to implement  
44 effective interventions. On-going primary care management of key risk factors for CKD (e.g.,  
45 hypertension, vascular disease, diabetes) is likely one effective strategy to reduce progression of  
46 CKD and reduce adverse complication rates. Early detection and treatment of CKD and reducing  
47 adverse events with appropriate medications also reduces the morbidity and cost of CKD and  
48 related complications. The work described in this protocol therefore has a huge potential to  
49 address the identified gaps for optimal care delivery of CKD at the primary care level that would  
50 impact positively on patients' outcomes and health system improvement.

1  
2  
3 **Contributors:** AKB and ND had the original idea for this study. AKB and PER wrote the first  
4 draft of the manuscript. PER, NT, AS, AG, DN, JAQ, CL, BS, EF, DT and DM contributed to  
5 the development of the idea, the study design and reviewed the manuscript for intellectual  
6 content. All authors approved the final submitted version of the manuscript.  
7  
8

9 **Funding:** This work is supported by the Canadian Institute of Health Research (CIHR)  
10 Operating Grant: SPOR PIHCI Network: Quick Strikes Grant (ref# RN281786), through the  
11 Universities of Alberta and Manitoba, and McMaster University.  
12  
13

14 **Competing interests:** None declared.  
15

16 **Ethics approval:** This project has been approved by the University of Alberta Health Research  
17 Ethics Committee. Identifiable patient data will not be shared during the project, thus  
18 maintaining confidentiality.  
19  
20

21 **Disclaimer:** The views expressed are those of the authors and not necessarily those of the CIHR,  
22 CPCSSN or the various institutions represented.  
23  
24

25 **Data sharing statement:** The authors will make available the full statistical analysis of the study  
26 results following publication if and when required. The results of the study will be submitted for  
27 publication in a leading medical/nephrology peer-reviewed journal.  
28  
29  
30  
31  
32  
33  
34  
35  
36  
37  
38  
39  
40  
41  
42  
43  
44  
45  
46  
47  
48  
49  
50  
51  
52  
53  
54  
55  
56  
57  
58  
59  
60

**REFERENCES**

1. Radhakrishnan J, Remuzzi G, Saran R, et al. Taming the chronic kidney disease epidemic: a global view of surveillance efforts. *Kidney Int* 2014;86:246-50.
2. Couser WG, Remuzzi G, Mendis S, Tonelli M. The contribution of chronic kidney disease to the global burden of major noncommunicable diseases. *Kidney Int* 2011;80:1258-70.
3. Bello AK, Levin A, Tonelli M, et al. Assessment of Global Kidney Health Care Status. *JAMA* 2017.
4. James MT, Hemmelgarn BR, Tonelli M. Early recognition and prevention of chronic kidney disease. *Lancet* 2010;375:1296-309.
5. Bello AK, Levin A, Manns BJ, et al. Effective CKD care in European countries: challenges and opportunities for health policy. *Am J Kidney Dis* 2015;65:15-25.
6. McBride D, Dohan D, Handley MA, Powe NR, Tuot DS. Developing a CKD registry in primary care: provider attitudes and input. *Am J Kidney Dis* 2014;63:577-83.
7. Stevens PE, O'Donoghue DJ, de Lusignan S, et al. Chronic kidney disease management in the United Kingdom: NEOERICA project results. *Kidney Int* 2007;72:92-9.
8. de Lusignan S, Chan T, Stevens P, et al. Identifying patients with chronic kidney disease from general practice computer records. *Fam Pract* 2005;22:234-41.
9. Garg AX, Adhikari NK, McDonald H, et al. Effects of computerized clinical decision support systems on practitioner performance and patient outcomes: a systematic review. *JAMA* 2005;293:1223-38.
10. Collins AJ, Foley RN, Gilbertson DT, Chen SC. United States Renal Data System public health surveillance of chronic kidney disease and end-stage renal disease. *Kidney Int Suppl* (2011) 2015;5:2-7.
11. Borbolla D, Giunta D, Figar S, Soriano M, Dawidowski A, de Quiros FG. Effectiveness of a chronic disease surveillance systems for blood pressure monitoring. *Stud Health Technol Inform* 2007;129:223-7.
12. Indicators for chronic disease surveillance. *MMWR Recomm Rep* 2004;53:1-6.
13. Saran R, Hedgeman E, Plantinga L, et al. Establishing a national chronic kidney disease surveillance system for the United States. *Clin J Am Soc Nephrol* 2010;5:152-61.
14. Mariani L, Stengel B, Combe C, et al. The CKD Outcomes and Practice Patterns Study (CKDopps): Rationale and Methods. *Am J Kidney Dis* 2016;68:402-13.
15. Levey AS, Schoolwerth AC, Burrows NR, Williams DE, Stith KR, McClellan W. Comprehensive public health strategies for preventing the development, progression, and complications of CKD: report of an expert panel convened by the Centers for Disease Control and Prevention. *Am J Kidney Dis* 2009;53:522-35.
16. Drawz PE, Archdeacon P, McDonald CJ, et al. CKD as a Model for Improving Chronic Disease Care through Electronic Health Records. *Clin J Am Soc Nephrol* 2015;10:1488-99.
17. Birtwhistle R, Keshavjee K, Lambert-Lanning A, et al. Building a pan-Canadian primary care sentinel surveillance network: initial development and moving forward. *J Am Board Fam Med* 2009;22:412-22.
18. Bello AK, Hemmelgarn B, Lloyd A, et al. Associations among estimated glomerular filtration rate, proteinuria, and adverse cardiovascular outcomes. *Clin J Am Soc Nephrol* 2011;6:1418-26.
19. Bello AK, Peters J, Wight J, de Zeeuw D, El Nahas M. A population-based screening for microalbuminuria among relatives of CKD patients: the Kidney Evaluation and Awareness Program in Sheffield (KEAPS). *Am J Kidney Dis* 2008;52:434-43.

20. Greiver M, Drummond N, Birtwhistle R, Queenan J, Lambert-Lanning A, Jackson D. Using EMRs to fuel quality improvement. *Can Fam Physician* 2015;61:92, e68-9.
21. Birtwhistle R, Godwin M, Leggett JA, Martin K. Linking health databases for research. *Can Fam Physician* 2015;61:382, e223-4.
22. Garies S, Birtwhistle R, Drummond N, Queenan J, Williamson T. Data Resource Profile: National electronic medical record data from the Canadian Primary Care Sentinel Surveillance Network (CPCSSN). *Int J Epidemiol* 2017.
23. Williamson T, Green ME, Birtwhistle R, et al. Validating the 8 CPCSSN case definitions for chronic disease surveillance in a primary care database of electronic health records. *Ann Fam Med* 2014;12:367-72.
24. Godwin M, Williamson T, Khan S, et al. Prevalence and management of hypertension in primary care practices with electronic medical records: a report from the Canadian Primary Care Sentinel Surveillance Network. *CMAJ Open* 2015;3:E76-82.
25. Levin A, Stevens PE. Summary of KDIGO 2012 CKD Guideline: behind the scenes, need for guidance, and a framework for moving forward. *Kidney Int* 2014;85:49-61.
26. Ronksley PE, Tonelli M, Quan H, et al. Validating a case definition for chronic kidney disease using administrative data. *Nephrol Dial Transplant* 2012;27:1826-31.
27. Vlasschaert ME, Bejaimal SA, Hackam DG, et al. Validity of administrative database coding for kidney disease: a systematic review. *Am J Kidney Dis* 2011;57:29-43.
28. Denburg MR, Haynes K, Shults J, Lewis JD, Leonard MB. Validation of The Health Improvement Network (THIN) database for epidemiologic studies of chronic kidney disease. *Pharmacoepidemiol Drug Saf* 2011;20:1138-49.
29. Levey AS, Stevens LA, Schmid CH, et al. A new equation to estimate glomerular filtration rate. *Ann Intern Med* 2009;150:604-12.
30. Aref-Eshghi E, Leung J, Godwin M, et al. Low density lipoprotein cholesterol control status among Canadians at risk for cardiovascular disease: findings from the Canadian Primary Care Sentinel Surveillance Network Database. *Lipids Health Dis* 2015;14:60.
31. Birtwhistle RV. Canadian Primary Care Sentinel Surveillance Network: a developing resource for family medicine and public health. *Can Fam Physician* 2011;57:1219-20.
32. Green ME, Natajara N, O'Donnell DE, et al. Chronic obstructive pulmonary disease in primary care: an epidemiologic cohort study from the Canadian Primary Care Sentinel Surveillance Network. *CMAJ Open* 2015;3:E15-22.
33. Greiver M, Williamson T, Barber D, et al. Prevalence and epidemiology of diabetes in Canadian primary care practices: a report from the Canadian Primary Care Sentinel Surveillance Network. *Can J Diabetes* 2014;38:179-85.
34. Kadhim-Saleh A, Green M, Williamson T, Hunter D, Birtwhistle R. Validation of the diagnostic algorithms for 5 chronic conditions in the Canadian Primary Care Sentinel Surveillance Network (CPCSSN): a Kingston Practice-based Research Network (PBRN) report. *J Am Board Fam Med* 2013;26:159-67.
35. Tonelli M, Wiebe N, Guthrie B, et al. Comorbidity as a driver of adverse outcomes in people with chronic kidney disease. *Kidney Int* 2015.
36. Hemmelgarn BR, Manns BJ, Straus S, et al. Knowledge translation for nephrologists: strategies for improving the identification of patients with proteinuria. *J Nephrol* 2012;25:933-43.
37. Byrne J, Xu G, Carr S. Developing an intervention to prevent acute kidney injury: using the Plan, Do, Study, Act (PDSA) service improvement approach. *J Ren Care* 2015;41:3-8.



- 1
- 2
- 3 38. Feehally J, Couser W, Dupuis S, et al. Nephrology in developing countries: the ISN's story. Lancet 2014;383:1271-2.
- 4
- 5
- 6 39. Tangri N, Stevens LA, Griffith J, et al. A predictive model for progression of chronic kidney disease to kidney failure. JAMA 2011;305:1553-9.
- 7
- 8 40. Hemmelgarn BR, Manns BJ, Lloyd A, et al. Relation Between Kidney Function, Proteinuria, and Adverse Outcomes. Jama-J Am Med Assoc 2010;303:423-9.
- 9
- 10 41. Motheral B, Brooks J, Clark MA, et al. A checklist for retrospective database studies--report of the ISPOR Task Force on Retrospective Databases. Value Health 2003;6:90-7.
- 11
- 12 42. Bello AK, Thadhani R, Hemmelgarn B, et al. Design and implementation of the Canadian Kidney Disease Cohort Study (CKDCS): A prospective observational study of incident hemodialysis patients. BMC Nephrol 2011;12:10.
- 13
- 14 43. Bello AK, Nwankwo E, El Nahas AM. Prevention of chronic kidney disease: a global challenge. Kidney Int Suppl 2005:S11-7.
- 15
- 16 44. Kilpatrick ES, Verrill H. A national audit of estimated glomerular filtration rate and proteinuria reporting in the UK. Ann Clin Biochem 2011;48:558-61.
- 17
- 18 45. Lamb EJ. United Kingdom guidelines for chronic kidney disease. Scand J Clin Lab Invest Suppl 2008;241:16-22.
- 19
- 20 46. Johnson DW, Atai E, Chan M, et al. KHA-CARI guideline: Early chronic kidney disease: detection, prevention and management. Nephrology (Carlton) 2013;18:340-50.
- 21
- 22 47. Akbari A, Clase CM, Acott P, et al. Canadian Society of Nephrology commentary on the KDIGO clinical practice guideline for CKD evaluation and management. Am J Kidney Dis 2015;65:177-205.
- 23
- 24 48. Crews DC. Chronic Kidney Disease: A Place for Primary Care and Nephrology to Meet. J Gen Intern Med 2015.
- 25
- 26
- 27
- 28
- 29
- 30
- 31
- 32
- 33
- 34
- 35
- 36
- 37
- 38
- 39
- 40
- 41
- 42
- 43
- 44
- 45
- 46
- 47
- 48
- 49
- 50
- 51
- 52
- 53
- 54
- 55
- 56
- 57
- 58
- 59
- 60

**Table 1: Data variables**

| Domain                                 | Variables                                                                                                                                                                                                                                                                                                                                                                                                                                                                                                                                                                                                                                                                                                                                                                                                                                                                                                                                                                                                                                                                                                                            |
|----------------------------------------|--------------------------------------------------------------------------------------------------------------------------------------------------------------------------------------------------------------------------------------------------------------------------------------------------------------------------------------------------------------------------------------------------------------------------------------------------------------------------------------------------------------------------------------------------------------------------------------------------------------------------------------------------------------------------------------------------------------------------------------------------------------------------------------------------------------------------------------------------------------------------------------------------------------------------------------------------------------------------------------------------------------------------------------------------------------------------------------------------------------------------------------|
| Patient Demographics and Clinical Data | <ul style="list-style-type: none"> <li>• Patient ID (unique patient number generated by CPCSSN)</li> <li>• Sex</li> <li>• Month &amp; Year of Birth</li> <li>• Occupation</li> <li>• Highest Education</li> <li>• Housing Status</li> <li>• Postal Code</li> <li>• EMR Status – Active, Deceased, Duplicate, Inactive, Unknown</li> <li>• Language</li> <li>• Race/Ethnicity</li> <li>• Deceased Year</li> <li>• Date Created (date this record was created)</li> <li>• Time Since Last Visit – 6, 12, 24 or 36 months</li> <li>• CPCSSN Conditions – yes / no for diabetes, depression, osteoarthritis, COPD, hypertension, dementia, Parkinson's, epilepsy</li> <li>• CPCSSN Conditions – count (i.e., numeric value)</li> <li>• Disease Case Indicator – disease (diabetes, depression, osteoarthritis, COPD, hypertension, dementia, Parkinson's, epilepsy)</li> <li>• Disease Case Indicator – Indicator Type (billing, encounter diagnosis, health conditions, lab result [HbA1C, fasting glucose], medication)</li> <li>• Disease Case Indicator – Indicator Value (numeric value of HbA1C and/or fasting glucose)</li> </ul> |
| Patient-Provider Pairing               | <ul style="list-style-type: none"> <li>• Patient ID (unique patient number generated by CPCSSN)</li> <li>• Provider ID (unique provider number generated by CPCSSN; primary provider of patient)</li> <li>• Start Date</li> <li>• End Date</li> </ul>                                                                                                                                                                                                                                                                                                                                                                                                                                                                                                                                                                                                                                                                                                                                                                                                                                                                                |
| Provider                               | <ul style="list-style-type: none"> <li>• Provider ID (unique provider number generated by CPCSSN)</li> <li>• Sex</li> <li>• Birth Year</li> </ul>                                                                                                                                                                                                                                                                                                                                                                                                                                                                                                                                                                                                                                                                                                                                                                                                                                                                                                                                                                                    |
| Billing                                | <ul style="list-style-type: none"> <li>• Patient ID (unique patient number generated by CPCSSN)</li> <li>• Date Created</li> <li>• Service Date</li> <li>• Diagnosis Text – cleaned</li> <li>• Diagnosis Text – original</li> <li>• Diagnosis Code Type (i.e., ICD9, ICD10)</li> <li>• Diagnosis Code (i.e., 401)</li> </ul>                                                                                                                                                                                                                                                                                                                                                                                                                                                                                                                                                                                                                                                                                                                                                                                                         |
| Clinical Encounters                    | <ul style="list-style-type: none"> <li>• Patient ID (unique patient number generated by CPCSSN)</li> <li>• Provider ID (unique provider number of the attending provider generated by CPCSSN)</li> <li>• Encounter Date</li> <li>• Encounter Type – academic clinic, community clinic</li> <li>• Reason for visit – cleaned</li> <li>• Reason for visit – original</li> </ul>                                                                                                                                                                                                                                                                                                                                                                                                                                                                                                                                                                                                                                                                                                                                                        |
| Encounter Diagnoses                    | <ul style="list-style-type: none"> <li>• Patient ID (unique patient number generated by CPCSSN)</li> <li>• Created Date</li> <li>• Diagnosis Text – cleaned</li> <li>• Diagnosis Text – original</li> <li>• Diagnosis Code Type (i.e., ICD9)</li> <li>• Diagnosis Code (i.e., 401)</li> </ul>                                                                                                                                                                                                                                                                                                                                                                                                                                                                                                                                                                                                                                                                                                                                                                                                                                        |
| Exam                                   | <ul style="list-style-type: none"> <li>• Patient ID (unique patient number generated by CPCSSN)</li> <li>• Exam Name – systolic BP, diastolic BP, height, weight, BMI, waist circumference, waist hip ratio (all values)</li> <li>• Result – cleaned numeric value</li> <li>• Result – original numeric value</li> <li>• Unit of Measure</li> <li>• Most Recent Value – yes, no</li> </ul>                                                                                                                                                                                                                                                                                                                                                                                                                                                                                                                                                                                                                                                                                                                                           |

|                            |                                                                                                                                                                                                                                                                                                                                                                                                                                                                                                                                                     |
|----------------------------|-----------------------------------------------------------------------------------------------------------------------------------------------------------------------------------------------------------------------------------------------------------------------------------------------------------------------------------------------------------------------------------------------------------------------------------------------------------------------------------------------------------------------------------------------------|
| Health Condition           | <ul style="list-style-type: none"> <li>• Patient ID (unique patient number generated by CPCSSN)</li> <li>• Created Date</li> <li>• Onset Date</li> <li>• Diagnosis Text – cleaned</li> <li>• Diagnosis Text – original</li> <li>• Diagnosis Code Type (i.e., ICD9)</li> <li>• Diagnosis Code (i.e., 401)</li> </ul>                                                                                                                                                                                                                                 |
| Laboratory                 | <ul style="list-style-type: none"> <li>• Patient ID (unique patient number generated by CPCSSN)</li> <li>• Date Performed</li> <li>• Lab Name – cleaned text (fasting glucose, glucose tolerance, HbA1C, HDL, LDL, total cholesterol, triglycerides, microalbumin, urine albumin creatinine ratio, hemoglobin, creatinine, eGFR / GFR)</li> <li>• Lab Name – original text</li> <li>• Lab Result – numeric value</li> <li>• Unit of Measure</li> <li>• Most Recent Value – yes, no</li> </ul>                                                       |
| Medical/Surgical Procedure | <ul style="list-style-type: none"> <li>• Patient ID (unique patient number generated by CPCSSN)</li> <li>• Date Created</li> <li>• Date Performed</li> <li>• Procedure Name – cleaned text</li> <li>• Procedure Name – original text</li> </ul>                                                                                                                                                                                                                                                                                                     |
| Medication                 | <ul style="list-style-type: none"> <li>• Patient ID (unique patient number generated by CPCSSN)</li> <li>• Start Date</li> <li>• Stop Date</li> <li>• Medication Name – cleaned text</li> <li>• Medication Name – original text</li> <li>• Medication Code – ATC code (<i>Anatomical Therapeutic Chemical classification system</i>)</li> <li>• Time Since (initial prescription)</li> <li>• DIN (Drug Identification Number)</li> <li>• Strength</li> <li>• Dose</li> <li>• Frequency</li> <li>• Unit of Measure</li> </ul>                        |
| Referral                   | <ul style="list-style-type: none"> <li>• Patient ID (unique patient number generated by CPCSSN)</li> <li>• Date Created</li> <li>• Date Completed</li> <li>• Referral Name – cleaned text</li> <li>• Referral Name – original text</li> </ul>                                                                                                                                                                                                                                                                                                       |
| Risk Factor                | <ul style="list-style-type: none"> <li>• Patient ID (the unique patient number generated by CPCSSN)</li> <li>• Date Created</li> <li>• Start Date</li> <li>• Stop Date</li> <li>• Most Recent – yes, no</li> <li>• Risk Factor Name – cleaned text (smoking, alcohol, diet, exercise, obesity)</li> <li>• Risk Factor Name – original text</li> <li>• Status – cleaned (current, never, n/a, not current, past, unknown)</li> <li>• Status – original</li> <li>• Value – cleaned</li> <li>• Frequency</li> <li>• Duration</li> <li>• End</li> </ul> |

Abbreviations: BMI, body mass index; BP, blood pressure; COPD, chronic obstructive pulmonary disease; CPCSSN, Canadian Primary Care Sentinel Surveillance Network; eGFR, estimated glomerular filtration rate; EMR, electronic medical records; HbA1C, glycated hemoglobin concentration; HDL, high density lipoprotein; LDL, low density lipoprotein

**Table 2: Elements of high quality CKD care as defined by standard national and international CKD Guidelines<sup>25,44-48</sup>**

| Domain                                                                | Objective                                                                                                                                                                                                                      | Measures                                                                                                                                                                                                                                                                                                                                                                                                                                                                                                                                                                                                                                                                                                                                                                                                                                                                                                                                                                                                                                                                                                                                                                                                                                                                                                                                                                                                                                                                                                                                                                                                   |
|-----------------------------------------------------------------------|--------------------------------------------------------------------------------------------------------------------------------------------------------------------------------------------------------------------------------|------------------------------------------------------------------------------------------------------------------------------------------------------------------------------------------------------------------------------------------------------------------------------------------------------------------------------------------------------------------------------------------------------------------------------------------------------------------------------------------------------------------------------------------------------------------------------------------------------------------------------------------------------------------------------------------------------------------------------------------------------------------------------------------------------------------------------------------------------------------------------------------------------------------------------------------------------------------------------------------------------------------------------------------------------------------------------------------------------------------------------------------------------------------------------------------------------------------------------------------------------------------------------------------------------------------------------------------------------------------------------------------------------------------------------------------------------------------------------------------------------------------------------------------------------------------------------------------------------------|
| Identification of CKD risk factors                                    | To establish an organized system for identification of people with risk factors, and evaluated for the presence of CKD markers                                                                                                 | Percentage of patients with risk factors* (present for at least 1 year) tested for CKD within the last 12 months                                                                                                                                                                                                                                                                                                                                                                                                                                                                                                                                                                                                                                                                                                                                                                                                                                                                                                                                                                                                                                                                                                                                                                                                                                                                                                                                                                                                                                                                                           |
| Identification of CKD                                                 | To establish an organized system where people with CKD are appropriately identified                                                                                                                                            | Proportion of patients with CKD correctly diagnosed and appropriately coded (validated based on KDIGO definition standard of using Scr measurements to derive eGFR<60mls/min based on 2 measures at least 90 days apart based on CKD-EPI equation.                                                                                                                                                                                                                                                                                                                                                                                                                                                                                                                                                                                                                                                                                                                                                                                                                                                                                                                                                                                                                                                                                                                                                                                                                                                                                                                                                         |
| Management of CKD: Monitoring of risk factors for progression and CVD | To establish an organized system to ensure CKD patients are receiving guideline-concordant care appropriate for the stage of CKD. This implies that those with early stages are being monitored appropriately in primary care. | <p>Proportion of patients receiving appropriate testing and monitoring:</p> <ul style="list-style-type: none"> <li>- Percentage of patients with urinary albumin tested within 6 months of Index GFR&lt;60 ml/min/1.73m<sup>2</sup></li> <li>- Percentage of patients with Index GFR&lt;60ml/min/1.73m<sup>2</sup> and diabetes mellitus who have glycated hemoglobin tested at least annually</li> <li>- Frequency of eGFR and albuminuria testing in patients with a baseline of eGFR&lt;60mls/min and/or ACR of 70mg/mmol (&lt;1 year, 1-2 years, &gt;2 years)</li> </ul> <p>Proportion of patients receiving appropriate cardiovascular risk management:</p> <ul style="list-style-type: none"> <li>- Percentage of patients &gt;50 years of age and eGFR&lt;45mls/min and/or CVD history on a statin medication</li> <li>- Percentage of patients with diabetes and proteinuria on an ACEi or ARB</li> <li>- Percentage of patients with history of CVD on appropriate secondary prevention (Aspirin, beta-blocker, ACEi, statin)</li> </ul> <p>Proportion of patients achieving treatment targets (BP, proteinuria, HbA1c).</p> <ul style="list-style-type: none"> <li>- Percentage of patients with diabetes and/or proteinuria (ACR&gt;70mg/mmol) achieving a target BP of ≤130/80mmHg</li> <li>- Percentage of patients with eGFR&lt;60mls/min achieving a target BP of ≤140/90mmHg</li> <li>- Percentage of patients with proteinuria (ACR&gt;70mg/mmol) achieving a target reduction to 50% of baseline</li> <li>- Percentage of patients with diabetes achieving a target HbA1c ~7%</li> </ul> |
| Appropriate referral system                                           | To develop a system where CKD patients that need specialist input to care are appropriately identified and referred.                                                                                                           | Proportion of patients appropriately referred for specialist care (defined by any visit to nephrologist or multi-disciplinary CKD clinic within the last 12 months, for those patients that meet the KDIGO referral criteria**)                                                                                                                                                                                                                                                                                                                                                                                                                                                                                                                                                                                                                                                                                                                                                                                                                                                                                                                                                                                                                                                                                                                                                                                                                                                                                                                                                                            |

\* Diabetes, hypertension, cardiovascular disease, nephrotoxic meds (NSAIDs, calcineurin inhibitors, lithium), certain urological disease (e.g., kidney stones, prostatic hypertrophy), multi-system diseases (e.g., lupus) and family history of kidney disease.

\*\* This would include advanced stages of CKD (eGFR<30 ml/min/1.73m<sup>2</sup>), significant albuminuria (albumin: creatinine ratio ≥70 mg/mmol), rapid loss of eGFR (>15 ml/min/1.73m<sup>2</sup>) refractory hypertension and history of acute kidney injury. Abbreviations: ACR, albumin: creatinine ratio; ACEi, angiotensin converting enzyme inhibitor; ARB, angiotensin-receptor blocker; BP, blood pressure; CKD, chronic kidney disease; CVD, cardiovascular disease; eGFR, estimated glomerular filtration rate; HbA1c, glycated hemoglobin concentration; KDIGO, Kidney Disease Improving Global Outcomes. Scr=serum creatinine.

**Table 3: Examples of Existing CKD Surveillance Programs**

| Program                 | Year of inception | Approach/methodology                                                                                                                                                               | Data sources                    | Spread                                      | Funding                                            |
|-------------------------|-------------------|------------------------------------------------------------------------------------------------------------------------------------------------------------------------------------|---------------------------------|---------------------------------------------|----------------------------------------------------|
| US CDC*                 | 2006              | Passive surveillance approach leveraging existing data sources                                                                                                                     | Administrative Surveys (NHANES) | National                                    | Governmental support                               |
| England QoF             | 2006              | An incentive-based (pay-for-performance system) that required all PCPs to establish a register for adults with CKD stages 3–5, and achieve guideline-concordant treatment targets. | Routine primary care records    | National                                    | Governmental support                               |
| CKD-JAC                 | 2008              | Routine care data across select CKD Clinics across Japan                                                                                                                           | Practice data                   | National                                    | Japanese Society of Nephrology & Industry          |
| CKD Queensland Registry | 2009              | Routine clinical care data                                                                                                                                                         | Practice data                   | Regional (state of Queensland)              | Research organizations and industry                |
| CPCSSN-CKD*             | 2017              | Passive surveillance using routine practice database                                                                                                                               | Routine primary care databases  | National (multiple regions and territories) | Research organizations and government (PHAC, CIHR) |

Abbreviations: CKD-JAC=Chronic kidney disease Japan Cohort, CKD=chronic kidney disease, CPCSSN =Canadian Primary Care Sentinel Surveillance Network, QoF=Quality and Outcomes Framework, US CDC =The United States Centers for Disease Control and Prevention CKD Surveillance System. \*Main database development started in 2005.

**Figure legends**

Figure 1: Map of Canada showing CPCSSN Networks Distribution

Figure 2: The project concept

Figure 3: Project timeline/milestones

---

For peer review only

1  
2  
3  
4  
5  
6  
7  
8  
9  
10  
11  
12  
13  
14  
15  
16  
17  
18  
19  
20  
21  
22  
23  
24  
25  
26  
27  
28  
29  
30  
31  
32  
33  
34  
35  
36  
37  
38  
39  
40  
41  
42  
43  
44  
45  
46  
47  
48  
49  
50  
51  
52  
53  
54  
55  
56  
57  
58  
59  
60

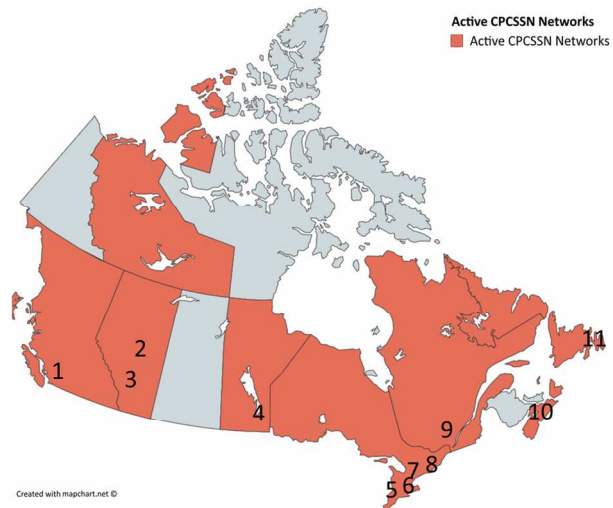

**Figure legend: Map of Canada showing the distribution of primary care research networks contributing data to the CPCSSN:**

1. British Columbia Primary Care Research Network (BCPCReN)
2. Northern Alberta Primary Care Research Network (NAPCRen)
3. Southern Alberta Primary Care Research Network (SAPCRen)
4. Manitoba Primary Care Research Network (MaPCReN)
5. DELPHI (Deliver Primary Healthcare Information) Project
6. McMaster University Sentinel and Information Collaboration (MUSIC)
7. University of Toronto Practice Based Research Network (UTOPIAN)
8. The Eastern Ontario Network (EON)
9. Réseau de recherche en soins primaires de l'Université de Montréal (RRSPUM)
10. Maritime Family Practice Research Network (MaRNet-FP)
11. Atlantic Practice Based Research Network (APBRN)

Map of Canada showing CPCSSN Networks Distribution

130x97mm (300 x 300 DPI)

ew only

1  
2  
3  
4  
5  
6  
7  
8  
9  
10  
11  
12  
13  
14  
15  
16  
17  
18  
19  
20  
21  
22  
23  
24  
25  
26  
27  
28  
29  
30  
31  
32  
33  
34  
35  
36  
37  
38  
39  
40  
41  
42  
43  
44  
45  
46  
47  
48  
49  
50  
51  
52  
53  
54  
55  
56  
57  
58  
59  
60

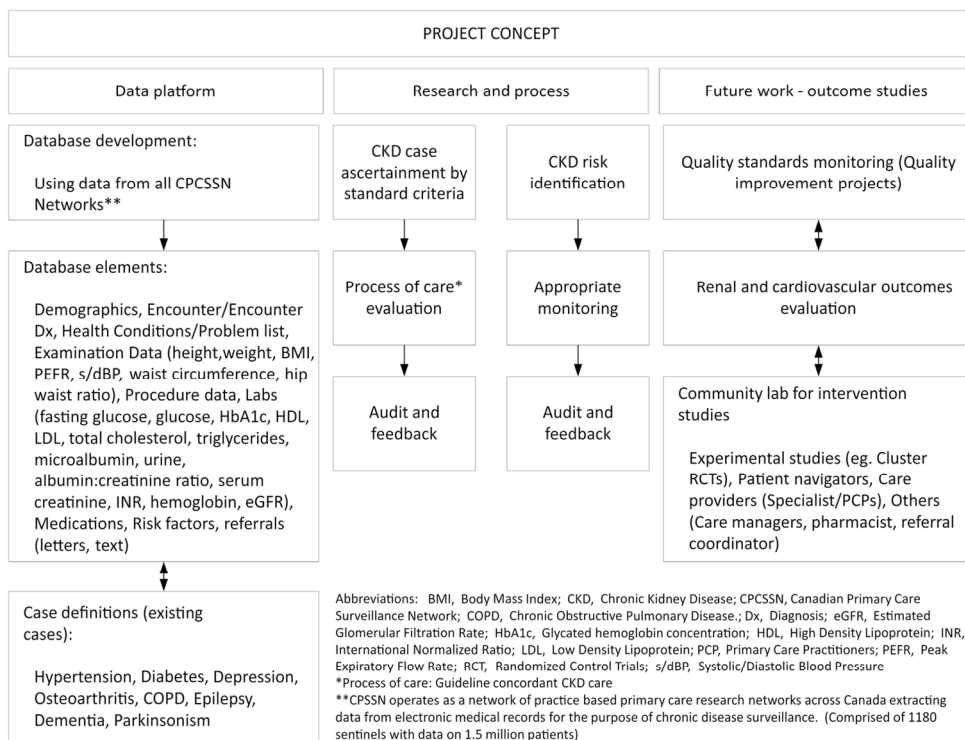

The project concept

132x101mm (300 x 300 DPI)

Peer Review Only



1  
2  
3  
4  
5  
6  
7  
8  
9  
10  
11  
12  
13  
14  
15  
16  
17  
18  
19  
20  
21  
22  
23  
24  
25  
26  
27  
28  
29  
30  
31  
32  
33  
34  
35  
36  
37  
38  
39  
40  
41  
42  
43  
44  
45  
46  
47  
48  
49  
50  
51  
52  
53  
54  
55  
56  
57  
58  
59  
60

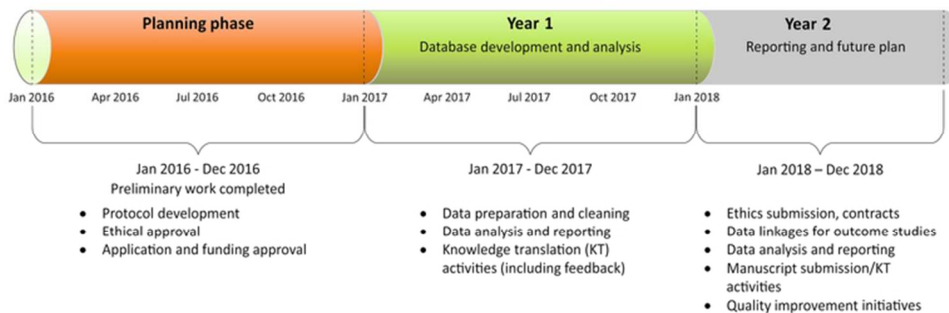

Project timeline/milestones

67x26mm (300 x 300 DPI)

Peer review only

# BMJ Open

## A National Surveillance Project on Chronic Kidney Disease Management in Canadian Primary Care: A Study Protocol

|                                    |                                                                                                                                                                                                                                                                                                                                                                                                                                                                                                                                                                                                                                                                                                                                                                                                                                                                                                                                              |
|------------------------------------|----------------------------------------------------------------------------------------------------------------------------------------------------------------------------------------------------------------------------------------------------------------------------------------------------------------------------------------------------------------------------------------------------------------------------------------------------------------------------------------------------------------------------------------------------------------------------------------------------------------------------------------------------------------------------------------------------------------------------------------------------------------------------------------------------------------------------------------------------------------------------------------------------------------------------------------------|
| Journal:                           | <i>BMJ Open</i>                                                                                                                                                                                                                                                                                                                                                                                                                                                                                                                                                                                                                                                                                                                                                                                                                                                                                                                              |
| Manuscript ID                      | bmjopen-2017-016267.R2                                                                                                                                                                                                                                                                                                                                                                                                                                                                                                                                                                                                                                                                                                                                                                                                                                                                                                                       |
| Article Type:                      | Protocol                                                                                                                                                                                                                                                                                                                                                                                                                                                                                                                                                                                                                                                                                                                                                                                                                                                                                                                                     |
| Date Submitted by the Author:      | 30-May-2017                                                                                                                                                                                                                                                                                                                                                                                                                                                                                                                                                                                                                                                                                                                                                                                                                                                                                                                                  |
| Complete List of Authors:          | Bello, A; University of Alberta, Edmonton, Alberta, Canada. , Medicine<br>Ronksley, Paul; University of Calgary, Community Health Sciences<br>Tangri, Navdeep; University of Manitoba, Medicine<br>Singer , Alexander; University of Manitoba College of Medicine, Department<br>of Family Medicine ; Manitoba Primary Care Research Network<br>Grill, Allan; University of Toronto<br>Nitsch, Dorothea; LSHTM<br>Queenan, John; Queen's University in Kingston, ON, Canada<br>Lindeman, Cliff; University of Alberta, Family Medicine<br>Soos, Boglarka; University of Calgary, Calgary, AB, Canada, Family<br>Medicine<br>Freiheit, Elizabeth; University of Michigan, Ann Arbor, MI, United States,<br>Institute for Social Research<br>Tuot, Delphine; University of California, San Francisco<br>Mangin, Dee ; McMaster University, Family Medicine<br>Drummond, Neil ; University of Alberta, Edmonton, AB, Canada, Family<br>Medicine |
| <b>Primary Subject<br>Heading</b>: | Renal medicine                                                                                                                                                                                                                                                                                                                                                                                                                                                                                                                                                                                                                                                                                                                                                                                                                                                                                                                               |
| Secondary Subject Heading:         | Epidemiology, Evidence based practice, General practice / Family practice,<br>Health informatics, Health services research                                                                                                                                                                                                                                                                                                                                                                                                                                                                                                                                                                                                                                                                                                                                                                                                                   |
| Keywords:                          | Protocols & guidelines < HEALTH SERVICES ADMINISTRATION &<br>MANAGEMENT, Quality in health care < HEALTH SERVICES<br>ADMINISTRATION & MANAGEMENT, Nephrology < INTERNAL MEDICINE,<br>Chronic renal failure < NEPHROLOGY                                                                                                                                                                                                                                                                                                                                                                                                                                                                                                                                                                                                                                                                                                                      |
|                                    |                                                                                                                                                                                                                                                                                                                                                                                                                                                                                                                                                                                                                                                                                                                                                                                                                                                                                                                                              |

SCHOLARONE™  
Manuscripts

## A National Surveillance Project on Chronic Kidney Disease Management in Canadian Primary Care: A Study Protocol

Aminu K Bello<sup>1</sup>, MD, PhD, FRCP, Paul E. Ronksley<sup>2</sup>, BSc, MSc, PhD, Navdeep Tangri<sup>3</sup> MD, PhD, FRCPC, Alex Singer<sup>4</sup>, MB BAO BCh CCFP, Allan Grill<sup>5</sup>, MD, CCFP, MPH, Dorothea Nitsch<sup>6</sup> MD, Dr Med, MSci, John A Queenan<sup>7</sup>, PhD, Cliff Lindeman<sup>8</sup>, BSc, MPH, Larka Boglarka Soos<sup>9</sup> BSc, MMath, Elizabeth Freiheit<sup>10</sup> BSc, PhD, Delphine Tuot<sup>11</sup> MD, Dee Mangin<sup>12</sup> MBChB, DPH, FRNZCGP, Neil Drummond<sup>13</sup> PhD

<sup>1</sup>Department of Medicine, University of Alberta, Edmonton, AB, Canada

<sup>2</sup>Department of Community Health Sciences, University of Calgary, Calgary, AB, Canada.

<sup>3</sup>Department of Medicine, University of Manitoba, Winnipeg, MB, Canada

<sup>4</sup>Department of Family Medicine, University of Manitoba, Winnipeg, MB, Canada

<sup>5</sup>Department of Family and Community Medicine, University of Toronto, Toronto, ON, Canada

<sup>6</sup>Department of Non-Communicable Disease Epidemiology, London School of Hygiene & Tropical Medicine, London, UK

<sup>7</sup>Epidemiologist for the Canadian Primary Care Sentinel Surveillance Network, Department of Family Medicine, Queen's University in Kingston, ON, Canada

<sup>8</sup>Department of Family Medicine, University of Alberta, Edmonton, AB, Canada

<sup>9</sup>Department of Family Medicine, University of Calgary, Calgary, AB, Canada

<sup>10</sup>Institute for Social Research, University of Michigan, Ann Arbor, MI, United States

<sup>11</sup>Department of Medicine, UCSF School of Medicine, San Francisco, CA, United States

<sup>12</sup>Department of Family Medicine, McMaster University, Hamilton, ON, Canada

<sup>13</sup>Department of Family Medicine, University of Alberta, Edmonton, AB, Canada

### Corresponding Author:

Aminu K Bello, MD PhD, FRCP

Division of Nephrology and Immunology

Department of Medicine

University of Alberta

11-107 Clinical Sciences Building, 8440 112 Street NW, Edmonton, Alberta, Canada T6B 2B7

Email: aminu1@ualberta.ca

Telephone: +1780-492-1867

Fax: +1780-407-7771

### Word Count

Abstract: 315

Main Text: (excluding abstract, references, tables, and figure): 2964

**Running title:** CKD Management in Canadian Primary Care

## ABSTRACT

**Introduction:** Effective chronic disease care is dependent on well-organized quality improvement (QI) strategies that monitor processes of care and outcomes for optimal care delivery. Although healthcare is provincially/territorially structured in Canada, there are national networks such as the Canadian Primary Care Sentinel Surveillance Network (CPCSSN) as important facilitators for national QI-based studies to improve chronic disease care. The goal of our study is to improve the understanding of how patients with chronic kidney disease (CKD) are managed in primary care and the variation across practices and provinces and territories to drive improvements in care delivery.

**Methods and analysis:** The CPCSSN database contains anonymized health information from the electronic medical records for patients of participating primary care practices (PCPs) across Canada (N=1200). The dataset includes information on patient socio-demographics, medications, laboratory results and comorbidities. Leveraging validated algorithms, case definitions and guidelines will help define CKD and the related processes of care, and enable us to: 1) determine prevalent CKD burden; 2) ascertain the current practice pattern on risk identification and management of CKD; 3) study variation in care indicators (e.g. achievement of blood pressure [BP] and proteinuria targets) and referral pattern for specialists kidney care. The process of care outcomes will be stratified across patients' demographics as well as provider and regional (provincial/territorial) characteristics. The prevalence of CKD stages 3-5 will be presented as age-sex standardized prevalence estimates stratified by province and as weighted averages for population rates with 95% confidence intervals (CI) using census data. For each PCP, age-sex standardized prevalence will be calculated and compared with expected standardized prevalence estimates. The process-based outcomes will be defined using established methods.

**Ethics and dissemination:** The CPCSSN is committed to high ethical standards when dealing with individual data collected, and this work is reviewed and approved by the Network Scientific Committee. The results will be published in peer-reviewed journals and presented at relevant national and international scientific meetings.

### Strengths and limitations of this study

- To our knowledge, this is the first nationwide and largest retrospective observational study on the epidemiology and management of CKD in primary care in Canada with potential to identify opportunities for improving quality of care for CKD at a national level.
- It will define the practice patterns on CKD risk identification in primary care by ascertaining whether high-risk groups are appropriately tested, monitored, and managed for CKD based on existing guideline recommendations.
- It will investigate the variation in CKD care delivery across patient, provider, and regional characteristics, relative to established quality indicators.
- This study leverages retrospective data collated at point of care, and therefore limitations include variable data quality and incomplete information in some data domains.
- The results of this study will enable the development of strategies and interventions to improve care and outcomes for patients with CKD.

## INTRODUCTION

There is an absence of effective surveillance mechanisms for chronic kidney disease (CKD) in most countries despite the overwhelming opinion of key stakeholders supporting such developments.<sup>1,2</sup> There are a few countries in the world with well-established CKD surveillance systems (Australia, Japan, UK and USA).<sup>1,3</sup> As with all other non-communicable diseases (NCDs), planning, development and implementation of effective and efficient care programs require reliable national data systems to monitor the burden of disease, processes of care and clinical outcomes.<sup>4-12</sup> Once established, these systems can be used for routine surveillance (including secular trends), quality improvement and resource allocation (including workforce planning). In Canada, they would also allow for within-country comparisons across provinces and territories, and evaluation of how the country compares with similar nations in CKD care. If combined with existing data sources (e.g., administrative databases), data on CKD management in primary care might also facilitate efforts to integrate CKD management with care for other major NCDs (e.g., diabetes, cardiovascular diseases, hypertension, obesity).<sup>5</sup>

Effective and sustainable chronic disease care is dependent on well-organized quality improvement (QI) strategies to monitor processes of care and outcomes and inform optimal care delivery.<sup>1</sup> In the CKD domain, end-stage renal disease (ESRD) care has been the sole focus of national QI activities, often administered in conjunction with national/regional registries (e.g., Canadian Organ Replacement Register, United States Renal Data System, European Renal Registry).<sup>1,5</sup> While there is no surveillance system for non-dialysis-dependent CKD in most countries, including Canada,<sup>5,13</sup> a few have developed initiatives in this direction.<sup>14 1,5,13,15</sup> A national CKD surveillance system using routinely collected practice data is feasible in nations with well-developed healthcare systems as CKD lends itself particularly well to surveillance because of its laboratory-based diagnosis.<sup>16</sup> Although healthcare is provincially/territorially structured and administered in Canada, there are existing national networks and collaborations such as the Canadian Primary Care Sentinel Surveillance Network (CPCSSN)<sup>17</sup> that can be important facilitators for national QI-based studies.

We set out to improve the understanding of how patients with CKD are managed and the variation across practitioners, regions, and provinces to drive improvements in care delivery. Our study is a multidisciplinary (nephrology, primary care) and cross-jurisdictional effort leveraging data from the CPCSSN to investigate the epidemiology and management of CKD in the Canadian primary care system. The overarching aim is to use data derived from primary care electronic medical records (EMRs) to identify gaps in care, and provide opportunities for interventions to improve care and patient outcomes.

### Objectives:

1. Develop and validate a case definition for CKD in primary care and apply this to ascertain the burden of CKD in primary care, obtaining data on unidentified cases using standard criteria.<sup>18,19</sup>
2. Determine the current practice patterns on CKD risk identification in primary care by ascertaining whether high-risk groups (e.g., individuals with diabetes, hypertension, and urologic disorders, and those with chronic use of nephrotoxic medications) are appropriately screened and managed for CKD.

3. Determine whether people with CKD are being managed based on established quality indicators, and investigate the care variation across patients' demographics (age, sex, socio-economic status, rural/urban residence, comorbidity burden), provider characteristics (family physician/nurse practitioner, year of graduation, rural/urban, individual/group, fee for service) and regional characteristics (intra- and inter-provincial/territorial variation, rural versus urban).

## METHODS AND ANALYSIS

### Setting

The CPCSSN<sup>17,20,21</sup> is the first pan-Canadian multi-disease surveillance system. The data resources profile and context within the Canadian health system are detailed elsewhere.<sup>22</sup> Canada is considered a high-income country by the World Bank Classification Index with a population of 35,362,905 (2016). It is the second largest country in the world with a land area of 9,984,670 sq km. It has a GDP of \$1.634 trillion (2016), and about 10.1% of this is spent on healthcare. In Canada, health care is a provincial or territorial mandate under the oversight of the Canada Health Act and with a financial assistance from the federal government ensuring universal, publicly funded health services to the population for medically-necessary care including physician visits, hospitalizations and, in some provinces universal drug coverage. Primary care is the first portal for accessing care particularly for routine chronic disease care.

The structure of CPCSSN comprised of a network of twelve practice-based primary care research networks that collect primary care health information from the EMRs of primary care providers (PCPs) in eight out of the ten provinces and one out of the three territories in the country (**Figure 1**). There are ~1200 sentinels (i.e., participating PCPs) contributing data to the CPCSSN, which is updated quarterly. This actively expanding repository currently contains data on approximately 1.5 million Canadians. The initial focus of the CPCSSN was to conduct surveillance on five chronic conditions: diabetes, hypertension, osteoarthritis, chronic obstructive pulmonary disease, and depression. Subsequently, it was expanded to include three neurological conditions: dementia, epilepsy, and Parkinson's disease. Our project team has been instrumental in working with CPCSSN to further expand on these conditions by including CKD, and this work on CKD will be conducted from January 2017 to December 2018. It will take place under the auspices of the Alberta's Strategy for Patient Oriented Research (SPOR)- Primary and Integrated Health Care Innovation Network (PIHCIN).

### Population and data sources

Data for the CPCSSN database are extracted from the EMRs of participating sentinels, rendered anonymous, coded and processed using established frameworks described in detail elsewhere.<sup>21,23</sup> The data are placed in regional network databases and then merged into the national repository. It is made available for surveillance and research, and increasingly for quality improvement projects and for clinical decision support where available, through the implementation of a patient re-identification tool held only within the custodial clinics themselves. With appropriate data sharing agreements with its sentinel PCPs, CPCSSN data may

1  
2  
3 be linked with administrative health data for future work to follow up on CKD-related outcomes  
4 (e.g., ascertainment of progression to dialysis requirement using registry data).  
5  
6

7 The CPCSSN database will be used to develop a cohort of CKD patients being managed in  
8 primary care between January 1, 2010 and December 31, 2015 (baseline cohort), and from  
9 January 1, 2016 onwards (open cohort). The database is updated quarterly, allowing for  
10 identification of new CKD patients who meet the inclusion criteria during the study period. The  
11 CPCSSN database contains patient information on socio-demographics (age, sex, socio-  
12 economic status (calculated deprivation category)), treatment (medications data), laboratory  
13 results and comorbidities (**Table 1, Figure 2**).<sup>21,24</sup> Patients under 18 years of age will be  
14 excluded from the cohorts, as will those diagnosed with ESRD and on dialysis or having renal  
15 transplant. We will leverage validated algorithms, case definitions and guidelines to define CKD,  
16 at-risk population and processes of care measures based on established methods and criteria  
17 (**Table 2**).<sup>25,26,27</sup>  
18  
19  
20

### 21 **Identification of CKD**

22 The major focus is to validate a case definition for CKD in primary care using the CPCSSN  
23 repository to enable us to identify patients with CKD. We will leverage the existing frameworks  
24 and conventions by national and international CKD guidelines, and definitions used  
25 elsewhere.<sup>26,28</sup> Serum creatinine (Scr) measurements will be used to calculate estimated  
26 glomerular filtration rate (eGFR) using CKD-EPI equation.<sup>29</sup> Individuals with at least one face-  
27 to-face PCP encounter and two calculated eGFR values  $<60$  ml/min per  $1.73$  m<sup>2</sup>  $>90$  days apart  
28 or having an International Classification of Diseases (ICD-9) diagnosis code for CKD used at  
29 least twice in an outpatient encounter as of December 31, 2015, will be defined to have CKD.  
30 We recognize the significant limitations of the ICD-9 codes when applied for CKD identification  
31 in the community, however, its use will allow us to capture those patients with CKD who may or  
32 may not have had an abnormal eGFR, for example cystic kidney diseases and other rare  
33 congenital disorders. In a secondary analysis, CKD will be defined by  $eGFR < 45$  ml/min/ $1.73$ m<sup>2</sup>  
34 using two values of eGFR  $>90$  days apart. This definition was selected because although  
35  $GFR < 60$  ml/min/ $1.73$ m<sup>2</sup> constitutes CKD, individuals with GFR between 45 and 60  
36 ml/min/ $1.73$ m<sup>2</sup> usually have favorable prognosis in the absence of proteinuria, and are  
37 substantially fewer in number than those with  $GFR < 45$ /min/ $1.73$ m<sup>2</sup>. Patients with  $eGFR < 45$   
38 ml/min/ $1.73$ m<sup>2</sup> are also a more attractive population for intervention due to higher risk of  
39 adverse clinical outcomes including risk of progression to ESRD<sup>2,14</sup>. Validation of the primary  
40 care CKD case definition algorithm will consist of an expert blinded chart review and  
41 identification of cases in a random sample of 1000 CPCSSN charts, containing both original and  
42 cleaned text data from the EMRs for patients aged 18 years or older, and comparison with the  
43 outcome of an independent search of the same sample using the CPCSSN case finding algorithm.  
44 Analysis will consist of calculations of sensitivity, specificity, and positive and negative  
45 predicted values. The prevalence of CKD stages 3-5 will be presented as unadjusted prevalence  
46 estimates and weighted averages for population rates with 95% confidence intervals (CI) using  
47 the census data, and stratified by PCP, rural/urban location and province or territory.  
48  
49  
50  
51  
52  
53  
54  
55  
56  
57  
58  
59  
60



## Evaluation of processes of care

The process-based outcomes (quality of care metrics) will be defined and evaluated using established methods across key domains of risk identification and case finding for CKD, as well as delivery of appropriate management including monitoring of risk factors for progression and cardiovascular disease (CVD), and referral for specialist nephrology care where necessary (Table 2). We are specifically focusing on the key domains of CKD management in primary care that include:

- CKD risk identification. This entails the evaluation of the proportion of patients with risk factors (diabetes and/or hypertension) present for at least one year that are tested for CKD within the previous 12 months of follow up.
- Identification of CKD. This is to determine the proportion of patients with CKD (defined based on laboratory measures), and/or correctly coded as having CKD in the EMR using defined clinical parameters.
- Management of CKD: This examines the current state of practice on the management of the common risk factors (BP, glycemia, proteinuria, dyslipidemia) associated with CKD progression and/or risk of CKD. For example, ascertaining the proportion of patients achieving guideline-concordant treatment targets (BP, proteinuria, HbA1c).
- Appropriate referral. This is to capture the proportion of patients appropriately referred for specialist kidney care (defined by any visit to nephrologist or multi-disciplinary CKD clinic within the last 12 months) based on guideline-concordant criteria for referral.

## Data analysis

### *Covariates definition and evaluation of CKD markers*

Socio-demographic, clinical, laboratory and medication data will be classified using standard definitions established by the CPCSSN.<sup>17,24,30-34</sup> Other comorbid conditions relevant to the care of CKD patients but not defined by the CPCSSN (coronary artery disease, stroke, peripheral vascular disease, heart failure) will be identified using standard procedures to search for those diagnoses in patients' medical records (based on validated ICD-9-CM coding algorithms<sup>35</sup>). Baseline kidney function (using estimated glomerular filtration rate, eGFR) will be calculated using all serum creatinine measurements taken within a six-month period of the first creatinine measurement, with the index eGFR defined as the mean of the six-month measurements. Assessment of urine protein excretion will be estimated using the albumin: creatinine ratio (ACR) based on spot urine measurements using standard conventions.<sup>25</sup> All CKD cases will be risk-stratified, defined and classified according to current guideline recommendations.<sup>25</sup> Demographic information (including age, sex and postal code) of those with and at risk of CKD will be extracted (**Tables 1 & 2**). Normally distributed variables will be summarized as means with standard deviations (SD), and non-normally distributed data will be summarized as medians with interquartile ranges (IQR). Dichotomous data will be expressed in percentages. The representativeness of the study population will be tested by comparing their age and sex profiles to the population distribution as reported in the Canadian 2011 Census (adjusting for 2016 census data when available).

## ETHICS AND DISSEMINATION

The CPCSSN is committed to high ethical standards when handling individual patient data collected from EMRs of participating PCPs from across Canada. These data are aggregated and stored in CPCSSN's central repository at the Centre for Advanced Computing, Queens University in Kingston, Ontario. There are well-developed organizational, physical and technological safeguards at all levels (clinic, provincial, national) to ensure that the privacy of patients is protected and that all collection, retention, use or disclosure of data complies with applicable privacy legislation and ethical requirements.<sup>17,21</sup> All personal identifiers are removed from the data in the national research repository to protect patient confidentiality.<sup>21</sup> The protocol has undergone a scientific review and approval by the CPCSSN Surveillance and Research Standing Committee (SRSC), and ethical approval for the study was granted by the University of Alberta Health Research Ethics Committee.

This project uses an integrated knowledge translation (KT) strategy, where relevant stakeholders (patients, practitioners, policymakers) have been involved from inception (proposal development) to ensure that the project addresses the needs of patients and practitioners. The activities underpinning the Alberta SPOR PIHCIN center on the patients and are patient-oriented, where the voices and perspectives of patients are solicited from research inception (e.g. defining research questions) to completion. The patients are collaborators rather than research subjects, and we have a patient representative on the project team to ensure patients voices and perspectives guide the work to completion, and that it remains patient-centered.

The involvement of the knowledge end-users (practitioners and policymakers) and the high priority that they place on the project will ensure that we drive it forward to completion and provide an opportunity to meaningfully change the way that care is delivered to CKD patients managed in primary care. For example, after identifying regions/clusters with especially suboptimal CKD care, we will collaborate with providers, policymakers and regional health authorities to improve care in those regions. We will apply the KT Canada Knowledge-to-Action Cycle Framework and other established methods (e.g., PDSA (Plan, Do, Study, Act) concept) to disseminate our findings to all relevant stakeholders and end-users for action.<sup>36,37</sup> We will leverage our collaborations with existing platforms and research networks such as the Canadian Society of Nephrology, CANN-NET (CANadian KidNey KNowledge TraNslation and GEneration NeTwork), Can-SOLVE CKD (Canadians Seeking Solutions and Innovations to Overcome Chronic Kidney Disease) and the country-wide Primary and Integrated Healthcare Innovation Networks to ensure the translation of our findings across provinces and territories, as well as internationally through our associations with the International Society of Nephrology and the Kidney Disease Improving Global Outcomes (KDIGO) team.<sup>5,38</sup> The results will be published in general medicine, nephrology and primary care peer-reviewed journals and presented at relevant national and international scientific meetings. A performance report will be produced against the indicators relevant to each objective, aggregated by practice sentinel, to highlight practice performance and map out areas for improvement, critical for continuing professional development of PCPs and helping to enhance CKD management in primary care. In future, this database will be linked to the Canadian Organ Replacement Registry and relevant provincial administrative databases to study clinically-relevant outcomes of risk and progression to kidney failure (ESRD) and adverse cardiovascular outcomes<sup>39,40</sup> (**Figure 3**).

1  
2  
3  
4  
5  
6  
7  
8  
9  
10  
11  
12  
13  
14  
15  
16  
17  
18  
19  
20  
21  
22  
23  
24  
25  
26  
27  
28  
29  
30  
31  
32  
33  
34  
35  
36  
37  
38  
39  
40  
41  
42  
43  
44  
45  
46  
47  
48  
49  
50  
51  
52  
53  
54  
55  
56  
57  
58  
59  
60

This work will close the information gap between observed and expected burdens and risks of CKD and map out standards of care achieved, providing opportunities for focused and effective population-level QI strategies and other service improvement initiatives. This project will demonstrate proof of concept for an early identification and management of CKD program in primary care, and provide the basis for developing relevant policies and KT strategies to enhance the uptake of findings – for people with CKD, and other chronic diseases as well. The work will facilitate identification and appropriate management of CKD patients at high risk of progression to ESRD. The findings will be reported based on existing reporting frameworks.<sup>41</sup>

We have anticipated potential threats and have devised strategies to mitigate them. The first related to feasibility within the defined timeframe (**Figure 3**). This is unlikely to hinder the success of the project as we have completed significant preliminary work for data access, and the team has considerable experience with the use of this kind of data for policy-relevant research.<sup>5,19,36,42,43</sup> Second, limitations general to the use of EMR data in research are acknowledged. The collated information is based on clinical encounters and needs, and thus may be missing for some important key variables and data quality may vary by region and/or sentinel; specifically, data on patients' priorities and satisfaction of care are rarely collated in a clinical setting. However, most important demographic, clinical and laboratory information needed for this study are well captured in the existing platform chosen for this work. Third, lack of use of patient-reported outcomes measures such as satisfaction with care, self-management support, etc could not be included as these were not routinely collated in this database.

In summary, planning, development, and implementation of nephrology services require reliable information systems and databases to capture information on trends in disease burden, processes of care and related outcomes. In the absence of national/regional health information systems, one way to achieve this is by the creation of surveillance systems using routine practice data, such as the CPCSSN and those established specifically for CKD in other jurisdictions across the world<sup>44-48</sup> (**Table 3**). The established conventions and guidelines on CKD can be leveraged for systematic case definition and evaluation of quality of care across settings. This can be facilitated by validation as well as enactment of quality metrics to measure the processes, quality of care and related outcomes, and generate uniformity across databases which may permit analyses across countries and regions. It is important to detect CKD early enough to be able to implement effective interventions. On-going primary care management of key risk factors for CKD (e.g., hypertension, vascular disease, diabetes) is likely one effective strategy to reduce progression of CKD and reduce adverse complication rates. Early detection and treatment of CKD and reducing adverse events with appropriate medications also reduces the morbidity and cost of CKD and related complications. The work described in this protocol therefore has a huge potential to address the identified gaps for optimal care delivery of CKD at the primary care level that would impact positively on patients' outcomes and health system improvement.

1  
2  
3 **Contributors:** AKB and ND had the original idea for this study. AKB and PER wrote the first  
4 draft of the manuscript. PER, NT, AS, AG, DN, JAQ, CL, BS, EF, DT and DM contributed to  
5 the development of the idea, the study design and reviewed the manuscript for intellectual  
6 content. All authors approved the final submitted version of the manuscript.  
7  
8

9 **Funding:** This work is supported by the Canadian Institute of Health Research (CIHR)  
10 Operating Grant: SPOR PIHCI Network: Quick Strikes Grant (ref# RN281786), through the  
11 Universities of Alberta and Manitoba, and McMaster University.  
12  
13

14 **Competing interests:** None declared.  
15

16 **Ethics approval:** This project has been approved by the University of Alberta Health Research  
17 Ethics Committee. Identifiable patient data will not be shared during the project, thus  
18 maintaining confidentiality.  
19  
20

21 **Disclaimer:** The views expressed are those of the authors and not necessarily those of the CIHR,  
22 CPCSSN or the various institutions represented.  
23  
24

25 **Data sharing statement:** The authors will make available the full statistical analysis of the study  
26 results following publication if and when required. The results of the study will be submitted for  
27 publication in a leading medical/nephrology peer-reviewed journal.  
28  
29  
30  
31  
32  
33  
34  
35  
36  
37  
38  
39  
40  
41  
42  
43  
44  
45  
46  
47  
48  
49  
50  
51  
52  
53  
54  
55  
56  
57  
58  
59  
60

**REFERENCES**

1. Radhakrishnan J, Remuzzi G, Saran R, et al. Taming the chronic kidney disease epidemic: a global view of surveillance efforts. *Kidney Int* 2014;86:246-50.
2. Couser WG, Remuzzi G, Mendis S, Tonelli M. The contribution of chronic kidney disease to the global burden of major noncommunicable diseases. *Kidney Int* 2011;80:1258-70.
3. Bello AK, Levin A, Tonelli M, et al. Assessment of Global Kidney Health Care Status. *JAMA* 2017.
4. James MT, Hemmelgarn BR, Tonelli M. Early recognition and prevention of chronic kidney disease. *Lancet* 2010;375:1296-309.
5. Bello AK, Levin A, Manns BJ, et al. Effective CKD care in European countries: challenges and opportunities for health policy. *Am J Kidney Dis* 2015;65:15-25.
6. McBride D, Dohan D, Handley MA, Powe NR, Tuot DS. Developing a CKD registry in primary care: provider attitudes and input. *Am J Kidney Dis* 2014;63:577-83.
7. Stevens PE, O'Donoghue DJ, de Lusignan S, et al. Chronic kidney disease management in the United Kingdom: NEOERICA project results. *Kidney Int* 2007;72:92-9.
8. de Lusignan S, Chan T, Stevens P, et al. Identifying patients with chronic kidney disease from general practice computer records. *Fam Pract* 2005;22:234-41.
9. Garg AX, Adhikari NK, McDonald H, et al. Effects of computerized clinical decision support systems on practitioner performance and patient outcomes: a systematic review. *JAMA* 2005;293:1223-38.
10. Collins AJ, Foley RN, Gilbertson DT, Chen SC. United States Renal Data System public health surveillance of chronic kidney disease and end-stage renal disease. *Kidney Int Suppl* (2011) 2015;5:2-7.
11. Borbolla D, Giunta D, Figar S, Soriano M, Dawidowski A, de Quiros FG. Effectiveness of a chronic disease surveillance systems for blood pressure monitoring. *Stud Health Technol Inform* 2007;129:223-7.
12. Indicators for chronic disease surveillance. *MMWR Recomm Rep* 2004;53:1-6.
13. Saran R, Hedgeman E, Plantinga L, et al. Establishing a national chronic kidney disease surveillance system for the United States. *Clin J Am Soc Nephrol* 2010;5:152-61.
14. Mariani L, Stengel B, Combe C, et al. The CKD Outcomes and Practice Patterns Study (CKDopps): Rationale and Methods. *Am J Kidney Dis* 2016;68:402-13.
15. Levey AS, Schoolwerth AC, Burrows NR, Williams DE, Stith KR, McClellan W. Comprehensive public health strategies for preventing the development, progression, and complications of CKD: report of an expert panel convened by the Centers for Disease Control and Prevention. *Am J Kidney Dis* 2009;53:522-35.
16. Drawz PE, Archdeacon P, McDonald CJ, et al. CKD as a Model for Improving Chronic Disease Care through Electronic Health Records. *Clin J Am Soc Nephrol* 2015;10:1488-99.
17. Birtwhistle R, Keshavjee K, Lambert-Lanning A, et al. Building a pan-Canadian primary care sentinel surveillance network: initial development and moving forward. *J Am Board Fam Med* 2009;22:412-22.
18. Bello AK, Hemmelgarn B, Lloyd A, et al. Associations among estimated glomerular filtration rate, proteinuria, and adverse cardiovascular outcomes. *Clin J Am Soc Nephrol* 2011;6:1418-26.
19. Bello AK, Peters J, Wight J, de Zeeuw D, El Nahas M. A population-based screening for microalbuminuria among relatives of CKD patients: the Kidney Evaluation and Awareness Program in Sheffield (KEAPS). *Am J Kidney Dis* 2008;52:434-43.

20. Greiver M, Drummond N, Birtwhistle R, Queenan J, Lambert-Lanning A, Jackson D. Using EMRs to fuel quality improvement. *Can Fam Physician* 2015;61:92, e68-9.
21. Birtwhistle R, Godwin M, Leggett JA, Martin K. Linking health databases for research. *Can Fam Physician* 2015;61:382, e223-4.
22. Garies S, Birtwhistle R, Drummond N, Queenan J, Williamson T. Data Resource Profile: National electronic medical record data from the Canadian Primary Care Sentinel Surveillance Network (CPCSSN). *Int J Epidemiol* 2017.
23. Williamson T, Green ME, Birtwhistle R, et al. Validating the 8 CPCSSN case definitions for chronic disease surveillance in a primary care database of electronic health records. *Ann Fam Med* 2014;12:367-72.
24. Godwin M, Williamson T, Khan S, et al. Prevalence and management of hypertension in primary care practices with electronic medical records: a report from the Canadian Primary Care Sentinel Surveillance Network. *CMAJ Open* 2015;3:E76-82.
25. Levin A, Stevens PE. Summary of KDIGO 2012 CKD Guideline: behind the scenes, need for guidance, and a framework for moving forward. *Kidney Int* 2014;85:49-61.
26. Ronksley PE, Tonelli M, Quan H, et al. Validating a case definition for chronic kidney disease using administrative data. *Nephrol Dial Transplant* 2012;27:1826-31.
27. Vlasschaert ME, Bejaimal SA, Hackam DG, et al. Validity of administrative database coding for kidney disease: a systematic review. *Am J Kidney Dis* 2011;57:29-43.
28. Denburg MR, Haynes K, Shults J, Lewis JD, Leonard MB. Validation of The Health Improvement Network (THIN) database for epidemiologic studies of chronic kidney disease. *Pharmacoepidemiol Drug Saf* 2011;20:1138-49.
29. Levey AS, Stevens LA, Schmid CH, et al. A new equation to estimate glomerular filtration rate. *Ann Intern Med* 2009;150:604-12.
30. Aref-Eshghi E, Leung J, Godwin M, et al. Low density lipoprotein cholesterol control status among Canadians at risk for cardiovascular disease: findings from the Canadian Primary Care Sentinel Surveillance Network Database. *Lipids Health Dis* 2015;14:60.
31. Birtwhistle RV. Canadian Primary Care Sentinel Surveillance Network: a developing resource for family medicine and public health. *Can Fam Physician* 2011;57:1219-20.
32. Green ME, Natajaran N, O'Donnell DE, et al. Chronic obstructive pulmonary disease in primary care: an epidemiologic cohort study from the Canadian Primary Care Sentinel Surveillance Network. *CMAJ Open* 2015;3:E15-22.
33. Greiver M, Williamson T, Barber D, et al. Prevalence and epidemiology of diabetes in Canadian primary care practices: a report from the Canadian Primary Care Sentinel Surveillance Network. *Can J Diabetes* 2014;38:179-85.
34. Kadhim-Saleh A, Green M, Williamson T, Hunter D, Birtwhistle R. Validation of the diagnostic algorithms for 5 chronic conditions in the Canadian Primary Care Sentinel Surveillance Network (CPCSSN): a Kingston Practice-based Research Network (PBRN) report. *J Am Board Fam Med* 2013;26:159-67.
35. Tonelli M, Wiebe N, Guthrie B, et al. Comorbidity as a driver of adverse outcomes in people with chronic kidney disease. *Kidney Int* 2015.
36. Hemmelgarn BR, Manns BJ, Straus S, et al. Knowledge translation for nephrologists: strategies for improving the identification of patients with proteinuria. *J Nephrol* 2012;25:933-43.
37. Byrne J, Xu G, Carr S. Developing an intervention to prevent acute kidney injury: using the Plan, Do, Study, Act (PDSA) service improvement approach. *J Ren Care* 2015;41:3-8.

- 1
- 2
- 3
- 4 38. Feehally J, Couser W, Dupuis S, et al. Nephrology in developing countries: the ISN's story. *Lancet* 2014;383:1271-2.
- 5
- 6 39. Tangri N, Stevens LA, Griffith J, et al. A predictive model for progression of chronic kidney disease to kidney failure. *JAMA* 2011;305:1553-9.
- 7
- 8 40. Hemmelgarn BR, Manns BJ, Lloyd A, et al. Relation Between Kidney Function, Proteinuria, and Adverse Outcomes. *Jama-J Am Med Assoc* 2010;303:423-9.
- 9
- 10 41. Motheral B, Brooks J, Clark MA, et al. A checklist for retrospective database studies--report of the ISPOR Task Force on Retrospective Databases. *Value Health* 2003;6:90-7.
- 11
- 12 42. Bello AK, Thadhani R, Hemmelgarn B, et al. Design and implementation of the Canadian Kidney Disease Cohort Study (CKDCS): A prospective observational study of incident hemodialysis patients. *BMC Nephrol* 2011;12:10.
- 13
- 14 43. Bello AK, Nwankwo E, El Nahas AM. Prevention of chronic kidney disease: a global challenge. *Kidney Int Suppl* 2005:S11-7.
- 15
- 16 44. Kilpatrick ES, Verrill H, National Clinical Biochemistry Audit G. A national audit of estimated glomerular filtration rate and proteinuria reporting in the UK. *Ann Clin Biochem* 2011;48:558-61.
- 17
- 18 45. Lamb EJ. United Kingdom guidelines for chronic kidney disease. *Scand J Clin Lab Invest Suppl* 2008;241:16-22.
- 19
- 20 46. Johnson DW, Atai E, Chan M, et al. KHA-CARI guideline: Early chronic kidney disease: detection, prevention and management. *Nephrology (Carlton)* 2013;18:340-50.
- 21
- 22 47. Akbari A, Clase CM, Acott P, et al. Canadian Society of Nephrology Commentary on the KDIGO Clinical Practice Guideline for CKD Evaluation and Management. *Am J Kidney Dis* 2015;65:177-205.
- 23
- 24 48. Crews DC. Chronic Kidney Disease: A Place for Primary Care and Nephrology to Meet. *J Gen Intern Med* 2015.
- 25
- 26
- 27
- 28
- 29
- 30
- 31
- 32
- 33
- 34
- 35
- 36
- 37
- 38
- 39
- 40
- 41
- 42
- 43
- 44
- 45
- 46
- 47
- 48
- 49
- 50
- 51
- 52
- 53
- 54
- 55
- 56
- 57
- 58
- 59
- 60

**Table 1: Data variables**

| Domain                                 | Variables                                                                                                                                                                                                                                                                                                                                                                                                                                                                                                                                                                                                                                                                                                                                                                                                                                                                                                                                                                                                                                                                                                                            |
|----------------------------------------|--------------------------------------------------------------------------------------------------------------------------------------------------------------------------------------------------------------------------------------------------------------------------------------------------------------------------------------------------------------------------------------------------------------------------------------------------------------------------------------------------------------------------------------------------------------------------------------------------------------------------------------------------------------------------------------------------------------------------------------------------------------------------------------------------------------------------------------------------------------------------------------------------------------------------------------------------------------------------------------------------------------------------------------------------------------------------------------------------------------------------------------|
| Patient Demographics and Clinical Data | <ul style="list-style-type: none"> <li>• Patient ID (unique patient number generated by CPCSSN)</li> <li>• Sex</li> <li>• Month &amp; Year of Birth</li> <li>• Occupation</li> <li>• Highest Education</li> <li>• Housing Status</li> <li>• Postal Code</li> <li>• EMR Status – Active, Deceased, Duplicate, Inactive, Unknown</li> <li>• Language</li> <li>• Race/Ethnicity</li> <li>• Deceased Year</li> <li>• Date Created (date this record was created)</li> <li>• Time Since Last Visit – 6, 12, 24 or 36 months</li> <li>• CPCSSN Conditions – yes / no for diabetes, depression, osteoarthritis, COPD, hypertension, dementia, Parkinson's, epilepsy</li> <li>• CPCSSN Conditions – count (i.e., numeric value)</li> <li>• Disease Case Indicator – disease (diabetes, depression, osteoarthritis, COPD, hypertension, dementia, Parkinson's, epilepsy)</li> <li>• Disease Case Indicator – Indicator Type (billing, encounter diagnosis, health conditions, lab result [HbA1C, fasting glucose], medication)</li> <li>• Disease Case Indicator – Indicator Value (numeric value of HbA1C and/or fasting glucose)</li> </ul> |
| Patient-Provider Pairing               | <ul style="list-style-type: none"> <li>• Patient ID (unique patient number generated by CPCSSN)</li> <li>• Provider ID (unique provider number generated by CPCSSN; primary provider of patient)</li> <li>• Start Date</li> <li>• End Date</li> </ul>                                                                                                                                                                                                                                                                                                                                                                                                                                                                                                                                                                                                                                                                                                                                                                                                                                                                                |
| Provider Information                   | <ul style="list-style-type: none"> <li>• Provider ID (unique provider number generated by CPCSSN)</li> <li>• Sex</li> <li>• Birth Year</li> </ul>                                                                                                                                                                                                                                                                                                                                                                                                                                                                                                                                                                                                                                                                                                                                                                                                                                                                                                                                                                                    |
| Billing Data                           | <ul style="list-style-type: none"> <li>• Patient ID (unique patient number generated by CPCSSN)</li> <li>• Date Created</li> <li>• Service Date</li> <li>• Diagnosis Text – cleaned</li> <li>• Diagnosis Text – original</li> <li>• Diagnosis Code Type (i.e., ICD9, ICD10)</li> <li>• Diagnosis Code (i.e., 401)</li> </ul>                                                                                                                                                                                                                                                                                                                                                                                                                                                                                                                                                                                                                                                                                                                                                                                                         |
| Clinical Encounters                    | <ul style="list-style-type: none"> <li>• Patient ID (unique patient number generated by CPCSSN)</li> <li>• Provider ID (unique provider number of the attending provider generated by CPCSSN)</li> <li>• Encounter Date</li> <li>• Encounter Type – academic clinic, community clinic</li> <li>• Reason for visit – cleaned</li> <li>• Reason for visit – original</li> </ul>                                                                                                                                                                                                                                                                                                                                                                                                                                                                                                                                                                                                                                                                                                                                                        |
| Encounter Diagnoses                    | <ul style="list-style-type: none"> <li>• Patient ID (unique patient number generated by CPCSSN)</li> <li>• Created Date</li> <li>• Diagnosis Text – cleaned</li> <li>• Diagnosis Text – original</li> <li>• Diagnosis Code Type (i.e., ICD9)</li> <li>• Diagnosis Code (i.e., 401)</li> </ul>                                                                                                                                                                                                                                                                                                                                                                                                                                                                                                                                                                                                                                                                                                                                                                                                                                        |
| Physical Examination Data              | <ul style="list-style-type: none"> <li>• Patient ID (unique patient number generated by CPCSSN)</li> <li>• Exam Name – systolic BP, diastolic BP, height, weight, BMI, waist circumference, waist hip ratio (all values)</li> <li>• Result – cleaned numeric value</li> <li>• Result – original numeric value</li> <li>• Unit of Measure</li> <li>• Most Recent Value – yes, no</li> </ul>                                                                                                                                                                                                                                                                                                                                                                                                                                                                                                                                                                                                                                                                                                                                           |



|                            |                                                                                                                                                                                                                                                                                                                                                                                                                                                                                                                                                     |
|----------------------------|-----------------------------------------------------------------------------------------------------------------------------------------------------------------------------------------------------------------------------------------------------------------------------------------------------------------------------------------------------------------------------------------------------------------------------------------------------------------------------------------------------------------------------------------------------|
| Health Condition           | <ul style="list-style-type: none"> <li>• Patient ID (unique patient number generated by CPCSSN)</li> <li>• Created Date</li> <li>• Onset Date</li> <li>• Diagnosis Text – cleaned</li> <li>• Diagnosis Text – original</li> <li>• Diagnosis Code Type (i.e., ICD9)</li> <li>• Diagnosis Code (i.e., 401)</li> </ul>                                                                                                                                                                                                                                 |
| Laboratory Data            | <ul style="list-style-type: none"> <li>• Patient ID (unique patient number generated by CPCSSN)</li> <li>• Date Performed</li> <li>• Lab Name – cleaned text (fasting glucose, glucose tolerance, HbA1C, HDL, LDL, total cholesterol, triglycerides, microalbumin, urine albumin creatinine ratio, hemoglobin, creatinine, eGFR / GFR)</li> <li>• Lab Name – original text</li> <li>• Lab Result – numeric value</li> <li>• Unit of Measure</li> <li>• Most Recent Value – yes, no</li> </ul>                                                       |
| Medical/Surgical Procedure | <ul style="list-style-type: none"> <li>• Patient ID (unique patient number generated by CPCSSN)</li> <li>• Date Created</li> <li>• Date Performed</li> <li>• Procedure Name – cleaned text</li> <li>• Procedure Name – original text</li> </ul>                                                                                                                                                                                                                                                                                                     |
| Medication Records         | <ul style="list-style-type: none"> <li>• Patient ID (unique patient number generated by CPCSSN)</li> <li>• Start Date</li> <li>• Stop Date</li> <li>• Medication Name – cleaned text</li> <li>• Medication Name – original text</li> <li>• Medication Code – ATC code (<i>Anatomical Therapeutic Chemical classification system</i>)</li> <li>• Time Since (initial prescription)</li> <li>• DIN (Drug Identification Number)</li> <li>• Strength</li> <li>• Dose</li> <li>• Frequency</li> <li>• Unit of Measure</li> </ul>                        |
| Referral Data              | <ul style="list-style-type: none"> <li>• Patient ID (unique patient number generated by CPCSSN)</li> <li>• Date Created</li> <li>• Date Completed</li> <li>• Referral Name – cleaned text</li> <li>• Referral Name – original text</li> </ul>                                                                                                                                                                                                                                                                                                       |
| Risk Factor data           | <ul style="list-style-type: none"> <li>• Patient ID (the unique patient number generated by CPCSSN)</li> <li>• Date Created</li> <li>• Start Date</li> <li>• Stop Date</li> <li>• Most Recent – yes, no</li> <li>• Risk Factor Name – cleaned text (smoking, alcohol, diet, exercise, obesity)</li> <li>• Risk Factor Name – original text</li> <li>• Status – cleaned (current, never, n/a, not current, past, unknown)</li> <li>• Status – original</li> <li>• Value – cleaned</li> <li>• Frequency</li> <li>• Duration</li> <li>• End</li> </ul> |

Abbreviations: BMI, body mass index; BP, blood pressure; COPD, chronic obstructive pulmonary disease; CPCSSN, Canadian Primary Care Sentinel Surveillance Network; eGFR, estimated glomerular filtration rate; EMR, electronic medical records; HbA1C, glycated hemoglobin concentration; HDL, high density lipoprotein; LDL, low density lipoprotein

**Table 2: Elements of high quality CKD care as defined by standard national and international CKD Guidelines<sup>25,44-48</sup>**

| Domain                                                                | Objective                                                                                                                                                                                                                      | Measures                                                                                                                                                                                                                                                                                                                                                                                                                                                                                                                                                                                                                                                                                                                                                                                                                                                                                                                                                                                                                                                                                                                                                                                                                                                                                                                                                                                                                                                                                                                                                                                                   |
|-----------------------------------------------------------------------|--------------------------------------------------------------------------------------------------------------------------------------------------------------------------------------------------------------------------------|------------------------------------------------------------------------------------------------------------------------------------------------------------------------------------------------------------------------------------------------------------------------------------------------------------------------------------------------------------------------------------------------------------------------------------------------------------------------------------------------------------------------------------------------------------------------------------------------------------------------------------------------------------------------------------------------------------------------------------------------------------------------------------------------------------------------------------------------------------------------------------------------------------------------------------------------------------------------------------------------------------------------------------------------------------------------------------------------------------------------------------------------------------------------------------------------------------------------------------------------------------------------------------------------------------------------------------------------------------------------------------------------------------------------------------------------------------------------------------------------------------------------------------------------------------------------------------------------------------|
| Identification of CKD risk factors                                    | To establish an organized system for identification of people with risk factors, and evaluated for the presence of CKD markers                                                                                                 | Percentage of patients with risk factors* (present for at least 1 year) tested for CKD within the last 12 months                                                                                                                                                                                                                                                                                                                                                                                                                                                                                                                                                                                                                                                                                                                                                                                                                                                                                                                                                                                                                                                                                                                                                                                                                                                                                                                                                                                                                                                                                           |
| Identification of CKD                                                 | To establish an organized system where people with CKD are appropriately identified                                                                                                                                            | Proportion of patients with CKD correctly diagnosed and appropriately coded (validated based on KDIGO definition standard of using Scr measurements to derive eGFR<60mls/min based on 2 measures at least 90 days apart based on CKD-EPI equation.                                                                                                                                                                                                                                                                                                                                                                                                                                                                                                                                                                                                                                                                                                                                                                                                                                                                                                                                                                                                                                                                                                                                                                                                                                                                                                                                                         |
| Management of CKD: Monitoring of risk factors for progression and CVD | To establish an organized system to ensure CKD patients are receiving guideline-concordant care appropriate for the stage of CKD. This implies that those with early stages are being monitored appropriately in primary care. | <p>Proportion of patients receiving appropriate testing and monitoring:</p> <ul style="list-style-type: none"> <li>- Percentage of patients with urinary albumin tested within 6 months of Index GFR&lt;60 ml/min/1.73m<sup>2</sup></li> <li>- Percentage of patients with Index GFR&lt;60ml/min/1.73m<sup>2</sup> and diabetes mellitus who have glycated hemoglobin tested at least annually</li> <li>- Frequency of eGFR and albuminuria testing in patients with a baseline of eGFR&lt;60mls/min and/or ACR of 70mg/mmol (&lt;1 year, 1-2 years, &gt;2 years)</li> </ul> <p>Proportion of patients receiving appropriate cardiovascular risk management:</p> <ul style="list-style-type: none"> <li>- Percentage of patients &gt;50 years of age and eGFR&lt;45mls/min and/or CVD history on a statin medication</li> <li>- Percentage of patients with diabetes and proteinuria on an ACEi or ARB</li> <li>- Percentage of patients with history of CVD on appropriate secondary prevention (Aspirin, beta-blocker, ACEi, statin)</li> </ul> <p>Proportion of patients achieving treatment targets (BP, proteinuria, HbA1c).</p> <ul style="list-style-type: none"> <li>- Percentage of patients with diabetes and/or proteinuria (ACR&gt;70mg/mmol) achieving a target BP of ≤130/80mmHg</li> <li>- Percentage of patients with eGFR&lt;60mls/min achieving a target BP of ≤140/90mmHg</li> <li>- Percentage of patients with proteinuria (ACR&gt;70mg/mmol) achieving a target reduction to 50% of baseline</li> <li>- Percentage of patients with diabetes achieving a target HbA1c ~7%</li> </ul> |
| Appropriate referral system                                           | To develop a system where CKD patients that need specialist input to care are appropriately identified and referred.                                                                                                           | Proportion of patients appropriately referred for specialist care (defined by any visit to nephrologist or multi-disciplinary CKD clinic within the last 12 months, for those patients that meet the KDIGO referral criteria**)                                                                                                                                                                                                                                                                                                                                                                                                                                                                                                                                                                                                                                                                                                                                                                                                                                                                                                                                                                                                                                                                                                                                                                                                                                                                                                                                                                            |

\* Diabetes, hypertension, cardiovascular disease, nephrotoxic meds (NSAIDs, calcineurin inhibitors, lithium), certain urological disease (e.g., kidney stones, prostatic hypertrophy), multi-system diseases (e.g., lupus) and family history of kidney disease.

\*\* This would include advanced stages of CKD (eGFR<30 ml/min/1.73m<sup>2</sup>), significant albuminuria (albumin: creatinine ratio ≥70 mg/mmol), rapid loss of eGFR (>15 ml/min/1.73m<sup>2</sup>)refractory hypertension and history of acute kidney injury. Abbreviations: ACR, albumin: creatinine ratio; ACEi, angiotensin converting enzyme inhibitor; ARB, angiotensin-receptor blocker; BP, blood pressure; CKD, chronic kidney disease; CVD, cardiovascular disease; eGFR, estimated glomerular filtration rate; HbA1c, glycated hemoglobin concentration; KDIGO, Kidney Disease Improving Global Outcomes. Scr=serum creatinine.

**Table 3: Examples of Existing CKD Surveillance Programs**

| Program                 | Year of inception | Approach/methodology                                                                                                                                                               | Data sources                    | Spread                                      | Funding                                            |
|-------------------------|-------------------|------------------------------------------------------------------------------------------------------------------------------------------------------------------------------------|---------------------------------|---------------------------------------------|----------------------------------------------------|
| US CDC*                 | 2006              | Passive surveillance approach leveraging existing data sources                                                                                                                     | Administrative Surveys (NHANES) | National                                    | Governmental support                               |
| England QoF             | 2006              | An incentive-based (pay-for-performance system) that required all PCPs to establish a register for adults with CKD stages 3–5, and achieve guideline-concordant treatment targets. | Routine primary care records    | National                                    | Governmental support                               |
| CKD-JAC                 | 2008              | Routine care data across select CKD Clinics across Japan                                                                                                                           | Practice data                   | National                                    | Japanese Society of Nephrology & Industry          |
| CKD Queensland Registry | 2009              | Routine clinical care data                                                                                                                                                         | Practice data                   | Regional (state of Queensland)              | Research organizations and industry                |
| CPCSSN-CKD*             | 2017              | Passive surveillance using routine practice database                                                                                                                               | Routine primary care databases  | National (multiple regions and territories) | Research organizations and government (PHAC, CIHR) |

Abbreviations: CKD-JAC=Chronic kidney disease Japan Cohort, CKD=chronic kidney disease, CPCSSN =Canadian Primary Care Sentinel Surveillance Network, QoF=Quality and Outcomes Framework, US CDC =The United States Centers for Disease Control and Prevention CKD Surveillance System. \*Main database development started in 2005.

**Figure legends**

Figure 1: Map of Canada showing CPCSSN Networks Distribution

Figure 2: The project concept

Figure 3: Project timeline/milestones

---

For peer review only

1  
2  
3  
4  
5  
6  
7  
8  
9  
10  
11  
12  
13  
14  
15  
16  
17  
18  
19  
20  
21  
22  
23  
24  
25  
26  
27  
28  
29  
30  
31  
32  
33  
34  
35  
36  
37  
38  
39  
40  
41  
42  
43  
44  
45  
46  
47  
48  
49  
50  
51  
52  
53  
54  
55  
56  
57  
58  
59  
60

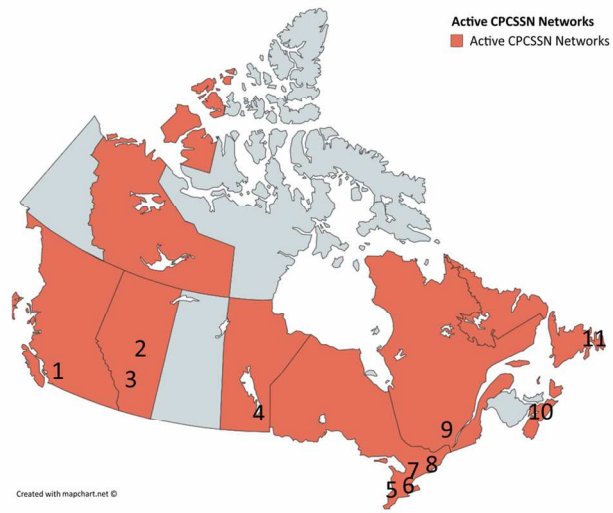

**Figure legend: Map of Canada showing the distribution of primary care research networks contributing data to the CPCSSN:**

1. British Columbia Primary Care Research Network (BCPCReN)
2. Northern Alberta Primary Care Research Network (NAPCRen)
3. Southern Alberta Primary Care Research Network (SAPCRen)
4. Manitoba Primary Care Research Network (MaPCReN)
5. DELPHI (Deliver Primary Healthcare Information) Project
6. McMaster University Sentinel and Information Collaboration (MUSIC)
7. University of Toronto Practice Based Research Network (UTOPIAN)
8. The Eastern Ontario Network (EON)
9. Réseau de recherche en soins primaires de l'Université de Montréal (RRSPUM)
10. Maritime Family Practice Research Network (MaRNet-FP)
11. Atlantic Practice Based Research Network (APBRN)

Figure 1: Map of Canada showing CPCSSN Networks Distribution

130x97mm (300 x 300 DPI)

ew only

1  
2  
3  
4  
5  
6  
7  
8  
9  
10  
11  
12  
13  
14  
15  
16  
17  
18  
19  
20  
21  
22  
23  
24  
25  
26  
27  
28  
29  
30  
31  
32  
33  
34  
35  
36  
37  
38  
39  
40  
41  
42  
43  
44  
45  
46  
47  
48  
49  
50  
51  
52  
53  
54  
55  
56  
57  
58  
59  
60



Figure 2: The project concept

132x101mm (300 x 300 DPI)

1  
2  
3  
4  
5  
6  
7  
8  
9  
10  
11  
12  
13  
14  
15  
16  
17  
18  
19  
20  
21  
22  
23  
24  
25  
26  
27  
28  
29  
30  
31  
32  
33  
34  
35  
36  
37  
38  
39  
40  
41  
42  
43  
44  
45  
46  
47  
48  
49  
50  
51  
52  
53  
54  
55  
56  
57  
58  
59  
60

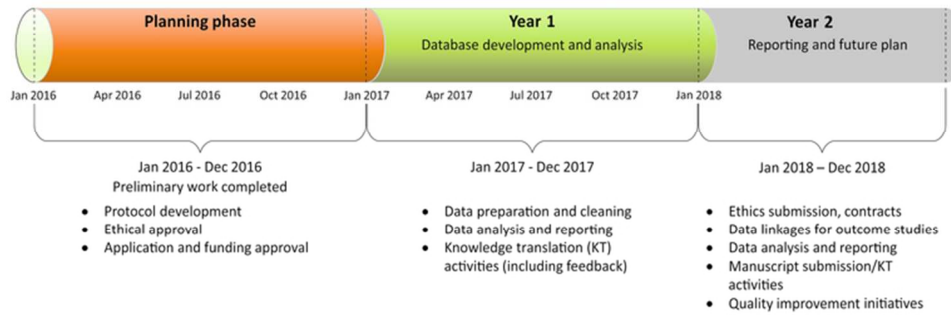

Figure 3: Project timeline/milestones

67x26mm (300 x 300 DPI)

Peer review only
